# Supplementary material
Source: publisher figshare collection journal article supplement (https://geolsoc.figshare.com/ndownloader/files/25995921)
Supplement: Supplementary file 1 [file 25995921]

## Sheet: U-Pb Data
	Supplementary File 3. All U-Pb data
					2σ Prop		2σ Prop			2σ Prop		207/235	2σ Prop	206/238	2σ Prop	207/206	2σ Prop	Best age	2σ Prop
	Grain #	[U] ppm	U/Th	207/235	error	206/238	error	RHO	207/206	error	RHO	Age Ma	error	Age (Ma)	error	Age (Ma)	error	(Ma)	error	% Discordance	Rim/Core
	161-74_1	200.4	0.845	0.1226	0.0067	0.01818	0.00046	0.091591	0.0495	0.0027	0.25422	117	6.1	116.1	2.9	160	100	116.1	2.9	0.769231
	161-74_2	99.3	1.324	0.132	0.011	0.01982	0.00065	0.12083	0.0491	0.0039	0.26	125	9.4	126.5	4.1	110	140	126.5	4.1	1.2
	161-74_3	132	1.263	0.1344	0.008	0.01891	0.00049	0.014114	0.052	0.0031	0.33447	127.2	7.2	120.8	3.1	240	120	120.8	3.1	5.03145
	161-74_4	151	2.1	3.831	0.12	0.2617	0.0062	0.78124	0.1059	0.0019	-0.16946	1597	25	1497	32	1721	34	1721	34	13.0157
	161-74_5	150.2	1.12	0.1229	0.008	0.01848	0.00054	0.1526	0.0488	0.0032	0.21635	117.1	7.2	118.1	3.4	120	120	118.1	3.4	0.853971
	161-74_6	93.7	1.367	0.146	0.014	0.01888	0.00073	0.080634	0.0569	0.0058	0.30596	137	12	120.6	4.6	390	200	120.6	4.6	11.9708
	161-74_7	801	3.34	0.1434	0.006	0.01929	0.00055	0.15767	0.0542	0.0022	0.44972	136	5.3	123.1	3.5	357	90	123.1	3.5	9.48529
	161-74_8	121.8	1.03	0.1374	0.0095	0.019	0.00052	0.049541	0.0534	0.0037	0.2485	129.7	8.4	121.3	3.3	270	130	121.3	3.3	6.47648
	161-74_9	109.3	1.164	0.132	0.0081	0.01924	0.00046	0.061357	0.0499	0.003	0.25728	125.1	7.3	122.8	2.9	170	110	122.8	2.9	1.83853
	161-74_10	96.5	1.322	0.133	0.012	0.01935	0.00065	0.09458	0.0503	0.0048	0.20796	126	11	123.5	4.1	150	170	123.5	4.1	1.98413	Rim
	161-74_10	77.4	1.334	0.137	0.012	0.02069	0.00074	0.13127	0.0487	0.0044	0.26727	130	11	132	4.7	110	160	132	4.7	1.53846	Core
	161-74_11	166	1.24	0.136	0.011	0.01884	0.00074	0.13777	0.0536	0.005	0.58442	129.2	10	120.3	4.7	280	180	120.3	4.7	6.88854	Rim
	161-74_11	107.3	1.263	0.148	0.013	0.02078	0.00065	0.15268	0.0519	0.0044	0.08217	141	12	132.5	4.1	240	160	132.5	4.1	6.02837	Core
	161-74_12	63.6	1.022	0.141	0.012	0.02016	0.00073	0.066303	0.052	0.0044	0.29696	132.9	10	128.6	4.6	200	150	128.6	4.6	3.23552
	161-74_13	210	1.213	0.1403	0.01	0.01853	0.00054	0.17449	0.0552	0.004	0.17579	132.5	9.2	118.3	3.4	340	140	118.3	3.4	10.717
	161-74_14	112.4	1.193	0.1377	0.0099	0.01967	0.00066	0.1831	0.0514	0.0036	0.26496	129.9	8.7	125.5	4.2	210	130	125.5	4.2	3.38722
	161-74_15	83.2	1.31	0.1379	0.01	0.01936	0.00057	0.05486	0.0515	0.0037	0.36898	129.9	8.9	123.6	3.6	240	140	123.6	3.6	4.84988
	161-74_16	482	1.142	0.1722	0.0067	0.02501	0.00058	0.2147	0.0501	0.0018	0.29258	161	5.8	159.2	3.7	189	73	159.2	3.7	1.11801
	161-74_17	198	1.132	0.1267	0.0079	0.01898	0.0005	0.11612	0.0491	0.0031	0.22968	120.5	7.1	121.2	3.2	130	120	121.2	3.2	0.580913
	161-74_18	129.9	1.285	0.1258	0.0081	0.01872	0.00047	0.18143	0.0487	0.0029	0.16635	119.6	7.2	119.6	2.9	130	110	119.6	2.9	0
	161-74_19	385	3.23	0.17	0.014	0.02413	0.00097	0.29734	0.05	0.0034	0.19791	158	12	153.6	6.1	170	130	153.6	6.1	2.78481
	161-74_20	591	0.748	0.1341	0.006	0.01902	0.00041	0.12719	0.0507	0.002	0.27961	127.6	5.4	121.5	2.6	228	87	121.5	2.6	4.78056	Rim
	161-74_20	217	0.916	0.148	0.012	0.02219	0.00089	0.25251	0.0488	0.004	0.27921	140	11	141.4	5.6	130	160	141.4	5.6	1	Core
	161-74_21	115.4	1.211	0.126	0.011	0.01906	0.0006	0.18642	0.0495	0.0046	0.28906	121	11	121.7	3.8	130	170	121.7	3.8	0.578512
	161-74_22	180.5	2.255	0.2	0.012	0.01901	0.00056	0.12742	0.0769	0.0049	0.34797	184.2	11	121.4	3.5	1040	130	121.4	3.5	34.0934
	161-74_23	205.2	1.454	0.136	0.012	0.01923	0.00086	0.054482	0.052	0.0047	0.44517	128.7	10	122.8	5.4	230	180	122.8	5.4	4.5843	Rim
	161-74_23	106.7	1.397	0.155	0.016	0.02056	0.0008	0.12882	0.0557	0.0065	0.32784	145	14	131.2	5.1	320	210	131.2	5.1	9.51724	Core
	161-74_24	91.7	0.989	0.19	0.018	0.0196	0.00059	0.098549	0.0699	0.0064	0.37841	175	15	125.1	3.8	810	190	125.1	3.8	28.5143
	161-74_25	157.3	1.68	0.125	0.018	0.0195	0.0011	0.34536	0.0465	0.0062	0.14309	119	16	124.7	7.2	40	250	124.7	7.2	4.78992	Rim
	161-74_25	70.5	1.448	0.14	0.014	0.02211	0.00086	0.05471	0.0481	0.0054	0.27427	132	12	140.9	5.4	90	200	140.9	5.4	6.74242	Core
	161-74_26	97.5	1.021	0.168	0.013	0.02143	0.00078	0.035095	0.057	0.0046	0.38142	156	11	136.7	4.9	420	160	136.7	4.9	12.3718
	161-74_28	142.8	1.236	0.207	0.013	0.01884	0.00052	0.25861	0.0796	0.0047	0.10964	189	11	120.3	3.3	1100	120	120.3	3.3	36.3492
	161-74_29	142.8	0.8066	0.1274	0.0086	0.01798	0.00049	0.085035	0.0521	0.0037	0.44279	121.1	7.7	114.9	3.1	230	140	114.9	3.1	5.11974
	161-74_30	123.4	0.934	0.1425	0.0099	0.0185	0.00061	0.2677	0.058	0.0046	0.51736	134.6	8.8	118.2	3.8	440	160	118.2	3.8	12.1842
	161-74_2	141	0.623	0.1427	0.0082	0.02027	0.00049	0.081139	0.0515	0.0034	0.31256	135.1	7.3	129.4	3.1	260	130	129.4	3.1	4.2191
	161-74_3	75.6	1.155	0.156	0.013	0.02323	0.00074	0.10878	0.0495	0.0045	0.17807	149	12	148	4.7	140	170	148	4.7	0.671141
	161-74_4	112.6	1.135	0.1457	0.0067	0.02061	0.00051	0.1536	0.0509	0.0024	0.32483	137.7	5.9	131.5	3.2	212	91	131.5	3.2	4.50254
	161-74_5	88	3.55	0.172	0.011	0.02157	0.00068	0.16417	0.0575	0.0037	0.28252	160.5	9.5	137.6	4.3	450	130	137.6	4.3	14.2679
	161-74_6	76	1.417	0.136	0.012	0.02041	0.00067	0.19963	0.0485	0.0044	0.12011	129	11	130.2	4.2	90	160	130.2	4.2	0.930233	Rim
	161-74_6	218	0.967	0.1495	0.0072	0.02183	0.00052	0.070352	0.0501	0.0027	0.38742	141.2	6.4	139.2	3.3	183	110	139.2	3.3	1.41643	Core
	161-74_7	72.8	1.581	0.1571	0.008	0.02062	0.00053	0.017446	0.0552	0.003	0.39731	147.4	7	131.5	3.3	377	110	131.5	3.3	10.787
	161-74_8	115.1	1.166	0.1314	0.0066	0.01999	0.00047	0.12701	0.0474	0.0024	0.33463	125	5.9	127.6	2.9	75	97	127.6	2.9	2.08
	161-74_9	52	1.803	0.14	0.011	0.02097	0.00059	0.13846	0.0486	0.0038	0.15083	131.9	9.5	133.7	3.7	100	140	133.7	3.7	1.36467
	161-74_10	82.4	1.066	0.153	0.012	0.02079	0.00056	0.15595	0.0533	0.0041	0.1387	144.1	10	132.6	3.5	290	150	132.6	3.5	7.98057
	161-74_11	74.5	1.059	0.1403	0.0088	0.02064	0.00056	0.16026	0.0493	0.0031	0.1956	132.6	7.8	131.7	3.5	160	120	131.7	3.5	0.678733
	161-74_12	126.6	0.918	0.1421	0.0067	0.02052	0.00052	0.092173	0.0509	0.0027	0.32715	135.4	6.2	130.9	3.3	205	100	130.9	3.3	3.32349
	161-74_13	119.9	1.181	0.1434	0.0069	0.02065	0.0005	0.12559	0.0497	0.0024	0.36556	135.6	6.1	131.8	3.2	164	93	131.8	3.2	2.80236
	161-74_14	60.4	1.387	0.145	0.012	0.02032	0.00067	0.13943	0.0518	0.0043	0.22471	137	11	129.7	4.2	230	160	129.7	4.2	5.32847
	161-74_16	82.4	1.695	0.139	0.011	0.02053	0.0007	0.1261	0.0486	0.0037	0.28155	131.2	9.7	131	4.4	130	150	131	4.4	0.152439
	161-74_17	107.2	1.058	0.1465	0.0091	0.0205	0.00052	0.247	0.0513	0.0031	0.14	138.2	8	130.8	3.3	220	120	130.8	3.3	5.35456
	161-74_18	72.6	1.334	0.1875	0.011	0.02169	0.00053	0.16079	0.0624	0.0035	0.23721	173.3	9.1	138.3	3.4	600	120	138.3	3.4	20.1962
	161-74_19	61.1	1.363	0.1422	0.0081	0.02076	0.00054	0.11673	0.0494	0.0028	0.18444	134.2	7.2	132.4	3.4	156	110	132.4	3.4	1.34128
	161-74_20	87.8	1.064	0.225	0.02	0.02201	0.00061	0.31098	0.0733	0.006	-0.021515	203	16	140.3	3.9	900	170	140.3	3.9	30.8867
	161-74_21	148.6	1.001	0.1403	0.0093	0.0202	0.00052	0.22963	0.0503	0.0038	0.53825	132.9	8.2	128.9	3.3	180	140	128.9	3.3	3.00978
	161-74_22	62.38	1.191	0.1475	0.0084	0.02097	0.00051	0.06659	0.051	0.0031	0.4054	138.9	7.5	133.7	3.2	210	120	133.7	3.2	3.7437
	161-74_23	104.6	1.321	0.235	0.015	0.02218	0.00061	0.16186	0.0764	0.0049	0.25681	213	12	141.4	3.8	1030	130	141.4	3.8	33.615
	161-74_24	124.2	1.223	0.1481	0.0085	0.02215	0.00056	0.10473	0.0485	0.0028	0.25915	139.7	7.4	141.2	3.6	120	110	141.2	3.6	1.07373
	161-74_25	53.1	1.052	0.161	0.012	0.0216	0.0006	0.0051703	0.0532	0.0038	0.26517	149.8	10	137.8	3.8	300	140	137.8	3.8	8.01068
	161-74_26	173.9	1.162	0.174	0.013	0.02082	0.00055	0.31493	0.0604	0.0049	-0.02174	162	11	132.8	3.5	590	180	132.8	3.5	18.0247
	161-74_27	312.8	0.5464	0.1438	0.007	0.02056	0.00056	0.036275	0.0506	0.0027	0.42388	136.2	6.2	131.2	3.5	203	110	131.2	3.5	3.67107
	161-74_29	91.3	1.347	0.1526	0.0083	0.02149	0.00049	0.081765	0.0506	0.0029	0.40071	143.4	7.3	137	3.1	200	110	137	3.1	4.46304
	161-74_30	99	1.155	0.1487	0.0085	0.02036	0.00055	0.098387	0.0528	0.0032	0.31407	141.3	7.8	129.9	3.5	290	120	129.9	3.5	8.06794
	161-74_31	116.1	1.032	0.1675	0.0093	0.02165	0.0006	0.04484	0.056	0.0033	0.35864	156.7	8	138.1	3.8	410	120	138.1	3.8	11.8698
	161-74_32	99.4	0.946	0.216	0.015	0.02175	0.00057	0.30275	0.0718	0.0048	0.030159	198	12	138.7	3.6	830	130	138.7	3.6	29.9495
	161-74_33	71.8	1.258	0.149	0.01	0.0214	0.00067	0.06141	0.0505	0.0037	0.38974	140.3	8.8	137.1	4.4	170	130	137.1	4.4	2.28083
	161-74_34	94.7	1.43	0.187	0.013	0.02152	0.00057	0.2758	0.0622	0.0042	0.076154	173	11	137.3	3.6	590	140	137.3	3.6	20.6358
	161-74_35	60.3	1.455	0.148	0.012	0.02191	0.0006	0.025289	0.0491	0.004	0.24008	139.6	10	139.7	3.8	140	150	139.7	3.8	0.0716332
	161-74_36	122.2	0.843	0.1356	0.0069	0.02076	0.00046	0.0037797	0.0476	0.0026	0.25417	128.8	6.2	132.4	2.9	79	100	132.4	2.9	2.79503
	161-74_37	51.3	2.109	0.167	0.011	0.02173	0.00055	0.011894	0.0566	0.0039	0.30196	155.7	9.3	138.6	3.5	360	130	138.6	3.5	10.9827
	161-74_38	93.2	1.146	0.1392	0.0085	0.02076	0.0005	0.00070333	0.0481	0.003	0.28852	131.6	7.5	132.4	3.2	110	110	132.4	3.2	0.607903
	161-74_40	76.1	1.509	0.1482	0.0083	0.02102	0.0005	0.052527	0.0504	0.0028	0.29921	139.5	7.3	134.1	3.1	205	110	134.1	3.1	3.87097
	161-74_41	73	1.144	0.1409	0.0081	0.02128	0.00054	0.075185	0.0488	0.003	0.28933	133.1	7.2	135.7	3.4	110	110	135.7	3.4	1.95342
	161-74_42	293.9	0.864	0.1401	0.0071	0.02076	0.00046	0.0019437	0.0486	0.0026	0.31736	132.9	6.3	132.5	2.9	128	100	132.5	2.9	0.300978
	161-74_43	81.7	1.361	0.1466	0.0087	0.0213	0.00051	0.12594	0.0498	0.003	0.2277	138.1	7.7	135.8	3.2	160	120	135.8	3.2	1.66546
	161-74_44	107.5	1.357	0.226	0.016	0.02166	0.00066	0.28205	0.074	0.0049	0.073857	205	13	138.1	4.2	970	140	138.1	4.2	32.6341
	161-74_45	57.6	1.668	0.1497	0.0096	0.02104	0.00061	0.035895	0.0523	0.0037	0.42294	140.6	8.4	134.2	3.9	220	130	134.2	3.9	4.55192
	161-74_46	90.4	0.623	0.133	0.011	0.01935	0.00057	0.08077	0.0499	0.004	0.29495	126.3	9.4	123.5	3.6	160	150	123.5	3.6	2.21694
	161-74_47	274	0.75	0.1459	0.0063	0.02067	0.00059	0.22973	0.0511	0.0023	0.40056	138	5.6	131.9	3.7	224	93	131.9	3.7	4.42029
	161-74_48	70.7	1.23	0.1467	0.0096	0.02073	0.00049	0.0082796	0.0507	0.0034	0.30608	137.9	8.4	132.2	3.1	190	130	132.2	3.1	4.13343
	161-74_49	92.2	1.088	0.145	0.0084	0.02154	0.00056	0.16713	0.0489	0.0029	0.15689	136.9	7.4	137.4	3.5	130	110	137.4	3.5	0.36523
	161-74_50	123	1.116	0.164	0.011	0.02376	0.00073	0.25791	0.0499	0.0032	0.16936	153.4	9.2	151.3	4.6	160	120	151.3	4.6	1.36897
	161-74_51	48.8	1.129	0.146	0.014	0.0211	0.00085	0.03176	0.0511	0.0052	0.25206	140	13	134.6	5.3	190	190	134.6	5.3	3.85714
	161-74_52	74.9	1.291	0.146	0.012	0.02029	0.0006	0.062263	0.0523	0.0044	0.29183	137.8	10	129.5	3.8	240	160	129.5	3.8	6.02322
	161-74_53	90.9	1.246	0.1554	0.0088	0.02178	0.00052	0.10007	0.0511	0.0029	0.22795	146	7.7	138.9	3.3	240	110	138.9	3.3	4.86301
	181_N154_1	352	1.138	0.1345	0.0049	0.02054	0.00039	0.13199	0.0483	0.0017	0.23907	127.9	4.3	131	2.5	113	68	131	2.5	2.42377
	181_N154_2	832	1.644	0.1465	0.0036	0.02163	0.00034	0.33397	0.04948	0.00093	0.04818	138.7	3.2	137.96	2.2	171	41	137.96	2.2	0.533526
	181_N154_3	131.6	1.297	0.1366	0.0067	0.02004	0.00041	0.1272	0.0502	0.0024	0.21795	129.4	5.9	127.9	2.6	170	91	127.9	2.6	1.1592
	181_N154_4	289.3	1.185	0.1355	0.0045	0.02	0.00036	0.075745	0.0496	0.0015	0.28434	128.8	4	127.7	2.3	177	64	127.7	2.3	0.854037
	181_N154_5	444	1.715	0.1411	0.0041	0.02084	0.00034	0.13724	0.0492	0.0012	0.22678	133.8	3.6	133	2.2	161	52	133	2.2	0.597907
	181_N154_6	292	1.411	0.1445	0.0057	0.02146	0.00039	0.22678	0.049	0.0017	0.14393	136.7	5	136.9	2.5	160	71	136.9	2.5	0.146306
	181_N154_8	228	1.07	0.1338	0.0053	0.01999	0.00037	0.015994	0.0489	0.0019	0.31126	127.6	4.9	127.6	2.3	138	76	127.6	2.3	0
	181_N154_9	1046	0.985	0.1372	0.0033	0.0204	0.00033	0.3372	0.04874	0.00088	0.07411	130.5	2.9	130.21	2.1	134	38	130.21	2.1	0.222222
	181_N154_13	454	4.34	0.158	0.012	0.02102	0.00039	0.15272	0.0569	0.0053	-0.056387	144.3	6.1	134.1	2.5	273	78	134.1	2.5	7.06861
	181_N154_14	972	0.955	0.142	0.005	0.0205	0.00036	0.074998	0.05	0.0015	0.13052	134.6	4.1	130.8	2.3	162	39	130.8	2.3	2.82318
	181_N154_15	126.1	1.231	0.17	0.01	0.02151	0.00047	0.11458	0.0572	0.0034	0.16093	158.3	8.9	137.2	3	420	120	137.2	3	13.3291
	181_N154_16	324.8	1.167	0.1963	0.0099	0.02091	0.00045	0.15676	0.0681	0.0033	0.099978	181.3	8.3	133.4	2.8	810	100	133.4	2.8	26.4203
	181_N154_17	349	4.88	0.216	0.016	0.02174	0.00046	0.49286	0.0727	0.0048	-0.32882	199	13	138.6	2.9	920	130	138.6	2.9	30.3518
	181_N154_18	253	1.247	0.1567	0.0072	0.02057	0.00038	0.33704	0.0554	0.0024	-0.12433	147.2	6.3	131.2	2.4	396	92	131.2	2.4	10.8696
	181_N154_19	91.3	2.46	0.1437	0.0084	0.02118	0.0005	0.090499	0.049	0.0028	0.1825	135.3	7.5	135.1	3.2	140	110	135.1	3.2	0.14782
	181_N154_20	394	4.13	0.1642	0.0063	0.01971	0.00036	0.061096	0.0605	0.0024	0.37727	154	5.5	125.8	2.3	584	84	125.8	2.3	18.3117
	181_N154_21	768	1.302	0.1426	0.0032	0.02096	0.00033	0.064993	0.04954	0.00097	0.42384	135.3	2.9	133.72	2.1	178	43	133.72	2.1	1.16778
	181_N154_22	288	1.471	0.1427	0.0047	0.02098	0.00039	0.097075	0.0498	0.0015	0.42144	135.2	4.2	133.9	2.5	183	64	133.9	2.5	0.961538
	181_N154_23	246.4	1.746	0.1484	0.0061	0.02119	0.00048	0.39865	0.0511	0.0018	0.073995	140.2	5.4	135.1	3.1	225	72	135.1	3.1	3.63766
	181_N154_24	121.2	1.312	0.1513	0.007	0.02155	0.00046	0.11451	0.0516	0.0024	0.37961	142.4	6.2	137.4	2.9	235	91	137.4	2.9	3.51124
	181_N154_25	667	1.258	0.1491	0.0036	0.02178	0.00037	0.19131	0.05003	0.00098	0.26267	141	3.2	138.9	2.3	191	42	138.9	2.3	1.48936
	181_N154_26	282.2	1.303	0.1396	0.0047	0.02109	0.00041	0.25511	0.0484	0.0015	0.15178	132.9	4.3	134.5	2.6	117	60	134.5	2.6	1.20391
	181_N154_27	152.3	1.371	0.151	0.011	0.02152	0.00052	0.18977	0.0517	0.0036	0.22693	142.3	9.4	137.2	3.3	230	130	137.2	3.3	3.58398
	181_N154_28	959	0.7938	0.1221	0.003	0.01751	0.0003	0.53564	0.05029	0.00087	0.050431	116.9	2.7	111.9	1.9	201	38	111.9	1.9	4.27716
	181_N154_29	303	2.303	0.1408	0.0064	0.02067	0.0004	0.063286	0.0497	0.0022	0.23794	133.2	5.7	131.9	2.5	163	85	131.9	2.5	0.975976
	181_N154_30	213	1.82	0.1397	0.0053	0.02046	0.00042	0.1373	0.0495	0.0018	0.27695	132.4	4.7	130.6	2.7	169	73	130.6	2.7	1.35952
	181_N154_31	433	1.1199	0.1403	0.0038	0.02082	0.00035	0.02354	0.0486	0.0012	0.33724	133.2	3.3	132.8	2.2	136	50	132.8	2.2	0.3003
	181_N154_32	531	1.162	0.1346	0.0042	0.01968	0.00036	0.047268	0.0497	0.0016	0.41281	128	3.8	125.6	2.3	168	62	125.6	2.3	1.875
	181_N154_33	324	1.812	0.1448	0.0067	0.02168	0.00049	0.086601	0.0483	0.0023	0.45684	139.1	6	138.2	3.1	116	94	138.2	3.1	0.647017
	181_N154_34	149.3	1.105	0.1355	0.0063	0.01997	0.00041	0.068808	0.0491	0.0023	0.16425	128.5	5.6	127.4	2.6	134	87	127.4	2.6	0.856031
	181_N154_35	525	1.268	0.1365	0.0041	0.02022	0.00037	0.20497	0.0486	0.0013	0.22456	129.7	3.6	129	2.3	144	55	129	2.3	0.539707
	181_N154_36	166.4	1.085	0.1408	0.0057	0.02119	0.00042	0.17278	0.0482	0.0018	0.14454	133.3	5	135.4	2.7	107	71	135.4	2.7	1.57539
	181_N154_37	352	0.9794	0.1392	0.0047	0.02075	0.00036	0.1587	0.0489	0.0015	0.18648	132.5	4.2	132.4	2.3	141	61	132.4	2.3	0.0754717
	181_N154_38	305.7	1.29	0.1521	0.0071	0.02011	0.00039	0.19431	0.0547	0.0024	0.10136	143.3	6.2	128.3	2.4	386	94	128.3	2.4	10.4676
	181_N154_39	222	1.355	0.1385	0.0051	0.0207	0.0004	0.074577	0.0485	0.0017	0.30582	131.4	4.5	132.1	2.5	129	70	132.1	2.5	0.532725
	181_N154_40	173	2.74	0.1473	0.0098	0.02207	0.00056	0.15214	0.049	0.0032	0.17835	138.9	8.7	140.7	3.5	130	120	140.7	3.5	1.2959
	181-N154_1	213.9	0.6853	0.1459	0.0055	0.02139	0.00043	0.041357	0.0491	0.0019	0.33259	138	4.9	136.5	2.7	152	79	136.5	2.7	1.08696
	181-N154_2	437.4	0.588	0.1369	0.0047	0.02081	0.00039	0.26637	0.0477	0.0016	0.11598	130.1	4.2	132.7	2.5	92	68	132.7	2.5	1.99846
	181-N154_3	220.3	0.6277	0.1449	0.0076	0.02137	0.0005	0.2257	0.0489	0.0025	0.14828	137.1	6.7	136.3	3.2	140	100	136.3	3.2	0.583516
	181-N154_4	258	0.711	0.1465	0.0075	0.02179	0.00059	0.03997	0.0482	0.0025	0.40371	138.6	6.7	138.9	3.8	130	110	138.9	3.8	0.21645
	181-N154_5	268.8	0.7161	0.1366	0.0063	0.02034	0.00043	0.019668	0.0485	0.0024	0.29731	129.8	5.7	129.8	2.7	126	97	129.8	2.7	0
	181-N154_6	90.3	1.292	0.1418	0.0077	0.02139	0.00048	0.01416	0.0474	0.0026	0.29154	134	6.8	136.4	3	92	100	136.4	3	1.79104
	181-N154_7	133.4	0.7308	0.1533	0.0073	0.02152	0.00047	0.019931	0.0514	0.0025	0.3758	144.2	6.4	137.2	3	235	99	137.2	3	4.85437
	181-N154_8	421	0.68	0.1416	0.0045	0.0211	0.0004	0.10995	0.0486	0.0016	0.30833	134.7	3.9	134.6	2.5	124	67	134.6	2.5	0.074239
	181-N154_9	246.8	0.7139	0.1458	0.0075	0.02088	0.00047	0.057081	0.0506	0.0027	0.24926	137.9	6.7	133.2	3	220	110	133.2	3	3.40827
	181-N154_10	186.1	0.825	0.1568	0.0068	0.02118	0.00042	0.10414	0.0536	0.0023	0.19538	148.1	6	135.1	2.6	319	90	135.1	2.6	8.77785
	181-N154_11	241	0.689	0.1447	0.0055	0.0213	0.00042	0.034547	0.0492	0.0019	0.34672	137	4.8	135.8	2.7	151	78	135.8	2.7	0.875912
	181-N154_12	315	0.5403	0.1449	0.0056	0.02122	0.00048	0.19528	0.0494	0.0019	0.3034	137.3	4.9	135.3	3	159	81	135.3	3	1.45666
	181-N154_13	150.7	0.982	0.1481	0.0073	0.02177	0.00046	0.22618	0.0492	0.0024	0.076598	139.9	6.4	138.8	2.9	150	95	138.8	2.9	0.786276
	181-N154_14	669	0.6543	0.1409	0.0047	0.02113	0.00038	0.25407	0.0482	0.0016	0.058939	133.7	4.2	134.78	2.4	112	69	134.78	2.4	0.807779
	181-N154_15	264	0.721	0.1452	0.0056	0.02142	0.00041	0.061222	0.0494	0.002	0.33425	137.4	5	136.6	2.6	166	82	136.6	2.6	0.582242
	181-N154_16	347	0.666	0.1406	0.005	0.0208	0.00041	0.29559	0.049	0.0017	0.09724	133.4	4.4	132.7	2.6	143	71	132.7	2.6	0.524738
	181-N154_17	201.7	0.735	0.1454	0.0057	0.02125	0.00043	0.049425	0.0496	0.002	0.30707	137.5	5	135.5	2.7	176	82	135.5	2.7	1.45455
	181-N154_18	270	0.741	0.1443	0.0054	0.0211	0.0004	0.10222	0.0494	0.0019	0.23776	136.6	4.7	134.6	2.5	158	76	134.6	2.5	1.46413
	181-N154_19	287	0.614	0.1453	0.0055	0.02131	0.00042	0.038451	0.0493	0.0019	0.31278	137.5	4.9	135.9	2.6	164	80	135.9	2.6	1.16364
	181-N154_20	269.8	0.766	0.141	0.011	0.02035	0.00067	0.30848	0.0508	0.0045	0.61726	133.9	9.7	129.9	4.3	210	180	129.9	4.3	2.9873
	181-N154_21	207	1.076	0.1468	0.0068	0.0218	0.0005	0.15018	0.0492	0.0023	0.23181	138.6	6	139	3.2	149	92	139	3.2	0.2886
	181-N154_22	182.7	0.5768	0.1444	0.0081	0.0214	0.00052	0.19517	0.0495	0.0029	0.16241	136.6	7.1	136.5	3.3	160	110	136.5	3.3	0.0732064
	181-N154_23	338.2	0.5901	0.1371	0.0052	0.02088	0.00042	0.22168	0.0479	0.0017	0.18221	130.8	4.4	133.2	2.7	92	77	133.2	2.7	1.83486
	181-N154_24	225	0.6424	0.174	0.011	0.02164	0.00049	0.29093	0.0588	0.0035	-0.036015	163.4	9.7	138	3.1	490	120	138	3.1	15.5447
	181-N154_25	196.8	0.664	0.1456	0.0055	0.02138	0.00041	0.020484	0.0495	0.0019	0.3607	137.7	4.9	136.4	2.6	166	79	136.4	2.6	0.944081
	181-N154_26	524	0.941	0.1433	0.0043	0.02141	0.00039	0.161	0.04879	0.0015	0.31949	135.9	3.8	136.5	2.5	137	64	136.5	2.5	0.441501
	181-N154_27	296	0.9873	0.142	0.0057	0.02066	0.00042	0.084078	0.05	0.0021	0.25833	134.6	5.1	131.8	2.7	183	84	131.8	2.7	2.08024
	181-N154_28	61.27	0.798	0.1473	0.0086	0.02174	0.00055	0.011765	0.0502	0.0031	0.34925	139.5	7.7	138.6	3.5	170	110	138.6	3.5	0.645161
	181-N154_29	699	0.52	0.1461	0.0043	0.02153	0.00039	0.15225	0.04921	0.0015	0.30256	138.4	3.8	137.3	2.4	160	64	137.3	2.4	0.794798
	181-N154_30	401	0.6139	0.1373	0.0049	0.02078	0.00038	0.055141	0.0481	0.0017	0.2505	130.5	4.3	132.6	2.4	108	73	132.6	2.4	1.6092
	181-N154_31	262	1.11	0.1526	0.0077	0.0216	0.00055	0.1123	0.0523	0.0028	0.31032	144.6	7	137.7	3.5	261	110	137.7	3.5	4.77178
	181-N154_32	302	1.64	0.17	0.012	0.02072	0.0007	0.20441	0.0599	0.0045	0.20669	159	11	132.2	4.4	550	150	132.2	4.4	16.8553
	181-N154_33	135.5	0.827	0.1415	0.0063	0.02136	0.00046	0.17013	0.0478	0.0021	0.25293	134	5.6	136.3	2.9	108	87	136.3	2.9	1.71642
	181-N154_34	474	0.792	0.1449	0.0049	0.02157	0.00039	0.10912	0.0489	0.0017	0.22125	137.2	4.3	137.6	2.5	146	71	137.6	2.5	0.291545
	181-N154_35	1511	0.97	0.1421	0.004	0.02133	0.0004	0.46505	0.04864	0.0013	0.25765	135.1	3.5	136.1	2.5	131	59	136.1	2.5	0.740192
	181-N154_36	254.6	0.5942	0.1484	0.0065	0.02129	0.00049	0.09045	0.0509	0.0024	0.45289	140.3	5.7	135.8	3.1	224	98	135.8	3.1	3.20741
	181-N154_37	215	1.293	0.71	0.021	0.08947	0.0016	0.06819	0.0579	0.0017	0.37712	544.8	12	552.4	9.7	510	66	552.4	9.7	1.39501
	181-N154_38	219	2.762	0.2951	0.0094	0.04146	0.00079	0.10751	0.052	0.0017	0.34794	262.1	7.4	261.8	4.9	267	70	261.8	4.9	0.11446
	181-N154_39	404	0.771	0.4608	0.013	0.06192	0.0011	0.41627	0.05422	0.0015	0.10732	384.5	9.2	387.2	6.9	373	63	387.2	6.9	0.702211
	181-N154_40	233	2.27	0.351	0.013	0.04764	0.0011	0.60372	0.0536	0.0018	-0.081272	304.3	10	300	6.7	332	72	300	6.7	1.41308
	181-N154_41	59.7	0.929	0.153	0.02	0.02009	0.00084	0.23584	0.0555	0.0073	0.038585	143	18	128.2	5.3	340	250	128.2	5.3	10.3497	Rim
	181-N154_41	95.5	0.6879	0.1389	0.0091	0.02105	0.0005	0.053451	0.0484	0.0033	0.27352	132.5	8.4	134.3	3.2	120	130	134.3	3.2	1.35849	Core
	188-S142_1	159.4	1.047	0.1689	0.0082	0.02214	0.00044	0.30627	0.0557	0.0026	0.1058	158.4	7.3	141.1	2.8	375	95	141.1	2.8	10.9217
	188-S142_2	215	1.004	0.1513	0.0069	0.02179	0.00036	0.010673	0.0498	0.0024	0.305	142.4	6.1	138.9	2.3	172	91	138.9	2.3	2.45787
	188-S142_3	609	0.498	0.1343	0.0041	0.01886	0.00032	0.3355	0.053	0.0015	0.17653	127.8	3.6	120.5	2	319	63	120.5	2	5.71205
	188-S142_4	448	0.804	0.1576	0.006	0.02127	0.00036	0.46527	0.0534	0.002	0.074658	148.1	5.2	135.7	2.3	323	76	135.7	2.3	8.37272
	188-S142_5	172.1	1.076	0.1524	0.0063	0.02187	0.00035	0.15391	0.0502	0.0021	0.18079	143.4	5.6	139.4	2.2	184	82	139.4	2.2	2.7894
	188-S142_6	186.9	1.179	0.1509	0.0065	0.02228	0.00037	0.031971	0.049	0.0022	0.27262	142.1	5.7	142	2.3	147	86	142	2.3	0.070373
	188-S142_7	174.3	1.336	0.299	0.01	0.02188	0.00051	0.21824	0.0995	0.0044	0.70242	264.3	7.9	139.5	3.2	1561	84	139.5	3.2	47.2191
	188-S142_8	453	0.625	0.171	0.0069	0.02229	0.0003	0.31814	0.0542	0.0019	-0.023272	159.6	5.9	142.1	1.9	366	76	142.1	1.9	10.9649
	188-S142_9	319	0.8	0.1991	0.0083	0.02453	0.00036	0.059687	0.0578	0.0024	0.24051	183.6	7	156.2	2.3	479	87	156.2	2.3	14.9237
	188-S142_10	294	0.915	0.1548	0.0051	0.02226	0.00033	0.033749	0.0499	0.0017	0.33916	145.7	4.5	141.9	2.1	185	69	141.9	2.1	2.6081
	188-S142_11	139.3	0.804	0.1508	0.0075	0.02232	0.00042	0.014571	0.0491	0.0026	0.35257	141.8	6.6	142.3	2.6	123	97	142.3	2.6	0.352609
	188-S142_12	186	0.944	0.1568	0.007	0.02211	0.00037	0.14051	0.0511	0.0023	0.25409	147.2	6.1	140.9	2.4	214	89	140.9	2.4	4.27989
	188-S142_13	587	0.847	0.1561	0.0036	0.02199	0.00032	0.1578	0.0511	0.0013	0.37256	147.5	3.3	140.2	2	236	53	140.2	2	4.94915
	188-S142_14	193.5	0.986	0.1603	0.0067	0.02291	0.00038	0.021085	0.0505	0.0023	0.31949	150.4	5.9	146	2.4	216	92	146	2.4	2.92553
	188-S142_15	256	0.994	0.168	0.0071	0.02296	0.0004	0.1218	0.0529	0.0023	0.23351	157.1	6.1	146.3	2.5	283	87	146.3	2.5	6.8746
	188-S142_16	337.8	0.647	0.1768	0.0051	0.02541	0.00033	0.15476	0.05	0.0014	0.23399	165	4.4	161.7	2.1	192	59	161.7	2.1	2
	188-S142_17	170	1.058	0.1814	0.0095	0.0225	0.00041	0.089505	0.0587	0.0032	0.1906	169.3	8.3	143.4	2.6	490	110	143.4	2.6	15.2983
	188-S142_18	363	0.895	0.1639	0.0052	0.02214	0.00032	0.059643	0.0532	0.0018	0.29608	153.7	4.5	141.1	2	316	69	141.1	2	8.19779
	188-S142_19	190.5	1.207	0.1585	0.0089	0.02285	0.0005	0.0097408	0.0509	0.0032	0.34379	148.8	7.8	145.6	3.1	210	120	145.6	3.1	2.15054
	188-S142_20	410	0.821	0.158	0.0071	0.0219	0.00043	0.053267	0.0522	0.0025	0.34162	148.7	6.2	139.6	2.7	270	99	139.6	2.7	6.1197
	188-S142_21	100.6	1.065	0.1448	0.0083	0.02122	0.00047	0.024266	0.0501	0.003	0.3264	136.3	7.2	135.3	3	170	110	135.3	3	0.733676
	188-S142_22	466	0.807	0.1719	0.006	0.02228	0.00036	0.20258	0.0565	0.0021	0.33839	160.7	5.1	142	2.2	427	77	142	2.2	11.6366
	188-S142_23	266	0.98	0.156	0.0062	0.02232	0.00036	0.027626	0.0508	0.0021	0.34618	146.6	5.4	142.3	2.2	214	82	142.3	2.2	2.93315
	188-S142_24	555	0.645	0.1614	0.0041	0.02355	0.00031	0.13654	0.0495	0.0013	0.28826	151.7	3.6	150.1	1.9	166	53	150.1	1.9	1.05471
	188-S142_25	303	1.176	0.1499	0.0056	0.02204	0.00038	0.075862	0.0494	0.002	0.32831	141.4	5	140.5	2.4	154	77	140.5	2.4	0.636492
	188-S142_26	129	1.408	0.1583	0.0087	0.02197	0.00045	0.12937	0.0525	0.003	0.21056	149.3	7.9	140.1	2.9	260	110	140.1	2.9	6.16209
	188-S142_27	194	0.985	0.1609	0.007	0.02241	0.00039	0.093359	0.0523	0.0025	0.38501	150.9	6.1	142.9	2.4	284	96	142.9	2.4	5.30152
	188-S142_28	220.8	0.759	0.1496	0.006	0.02206	0.00034	0.024567	0.049	0.002	0.35038	141.1	5.3	140.6	2.2	145	81	140.6	2.2	0.354359
	188-S142_29	388	0.809	0.1582	0.0053	0.02207	0.00036	0.27768	0.0519	0.0017	0.15838	148.7	4.6	140.7	2.2	265	67	140.7	2.2	5.37996
	188-S142_30	174.1	0.993	0.1496	0.007	0.02141	0.00038	0.012114	0.0508	0.0025	0.28824	140.9	6.1	136.6	2.4	212	98	136.6	2.4	3.05181
	188-S142_1	998	0.59	0.1587	0.0047	0.02193	0.00039	0.14853	0.05304	0.0016	0.27444	149.5	4.1	139.84	2.5	320	67	139.84	2.5	6.46154
	188-S142_2	373	0.834	0.1523	0.0057	0.02221	0.00045	0.24568	0.0504	0.002	0.11585	143.7	5	141.6	2.8	207	81	141.6	2.8	1.46138
	188-S142_3	166.3	1.01	0.1563	0.0071	0.02217	0.00046	0.034821	0.052	0.0024	0.2733	147	6.2	141.3	2.9	261	95	141.3	2.9	3.87755
	188-S142_4	334	0.931	0.1518	0.0059	0.02337	0.00048	0.1648	0.048	0.002	0.2106	143.3	5.2	148.9	3	99	82	148.9	3	3.90789
	188-S142_5	132.4	1.006	0.1619	0.0079	0.02178	0.0005	0.29083	0.055	0.0027	0.11502	151.9	6.9	138.9	3.2	370	100	138.9	3.2	8.55826
	188-S142_6	131.1	1.189	0.1612	0.0074	0.02308	0.00053	0.092745	0.0516	0.0024	0.28565	151.2	6.5	147.1	3.4	241	94	147.1	3.4	2.71164
	188-S142_7	199	1.041	0.1541	0.0065	0.02211	0.00046	0.14142	0.0509	0.0021	0.24406	145.1	5.7	141	2.9	214	84	141	2.9	2.82564
	188-S142_8	386	0.699	0.1514	0.0059	0.02177	0.00048	0.056139	0.0507	0.0019	0.39204	142.9	5.2	138.8	3	233	84	138.8	3	2.86914
	188-S142_10	97.3	1.55	0.1568	0.0095	0.02234	0.00053	0.12895	0.0513	0.0031	0.19933	147.1	8.3	142.4	3.4	230	120	142.4	3.4	3.19511
	188-S142_11	529.9	0.4533	0.1617	0.0063	0.0216	0.00045	0.19256	0.055	0.0022	0.2493	152.1	5.5	137.7	2.9	395	86	137.7	2.9	9.46746
	188-S142_12	105	1.367	0.1539	0.01	0.02371	0.00073	0.006442	0.0479	0.0033	0.45978	144.5	8.9	151.1	4.6	100	130	151.1	4.6	4.56747
	188-S142_13	214	0.85	0.1519	0.0068	0.02193	0.00047	0.08859	0.0507	0.0022	0.29968	143.2	5.9	139.9	2.9	204	88	139.9	2.9	2.30447
	188-S142_14	73.3	1.43	0.158	0.012	0.02295	0.00072	0.0013691	0.0507	0.0038	0.36675	148.3	10	146.2	4.5	210	150	146.2	4.5	1.41605
	188-S142_15	669	0.825	0.1453	0.0051	0.02187	0.00055	0.14654	0.0487	0.0019	0.5268	137.6	4.5	139.5	3.5	135	81	139.5	3.5	1.38081
	188-S142_16	140	0.884	0.1462	0.0072	0.02247	0.00053	0.040554	0.0476	0.0024	0.3639	139	6.2	143.2	3.3	95	97	143.2	3.3	3.02158
	188-S142_17	814	0.549	0.1559	0.0054	0.02087	0.00041	0.16969	0.0547	0.002	0.53512	147	4.7	133.2	2.6	392	85	133.2	2.6	9.38776
	188-S142_18	133	1.077	0.146	0.0089	0.021	0.00053	0.16085	0.0512	0.0031	0.14473	137.9	7.9	134	3.4	220	120	134	3.4	2.82814
	188-S142_19	211.1	1.129	0.1439	0.0063	0.02148	0.00048	0.026806	0.0494	0.0022	0.18251	136.2	5.5	137	3	156	89	137	3	0.587372
	188-S142_20	144.6	0.8302	0.1575	0.0067	0.02285	0.00051	0.022024	0.0512	0.0023	0.34478	148.7	6	145.6	3.2	218	89	145.6	3.2	2.08473
	188-S142_21	617	0.6684	0.15	0.005	0.02159	0.00041	0.18729	0.0511	0.0017	0.27081	141.7	4.4	137.7	2.6	235	72	137.7	2.6	2.82287
	188-S142_22	994	0.6718	0.1467	0.0045	0.02213	0.00043	0.28697	0.04874	0.0015	0.28673	139	4	141.1	2.7	135	65	141.1	2.7	1.51079
	188-S142_23	105.7	1.41	0.1545	0.0084	0.02283	0.00064	0.091316	0.0499	0.0029	0.32624	146.4	7.7	145.5	4.1	190	110	145.5	4.1	0.614754
	188-S142_25	107.5	1.25	0.162	0.0083	0.02304	0.00053	0.25081	0.0513	0.0026	0.084392	151.8	7.2	146.8	3.3	231	100	146.8	3.3	3.29381
	188-S142_26	260	0.682	0.195	0.011	0.02207	0.00066	0.18881	0.0644	0.004	0.30087	180.7	9.7	140.7	4.2	720	130	140.7	4.2	22.1361
	188-S142_27	106.9	1.332	0.1588	0.0074	0.02222	0.0005	0.22856	0.0519	0.0025	0.21569	149.1	6.5	141.6	3.2	259	96	141.6	3.2	5.03018
	188-S142_28	608	0.933	0.1443	0.0058	0.02093	0.00047	0.43168	0.0501	0.002	0.095814	136.7	5.2	133.5	3	197	86	133.5	3	2.34089
	188-S142_29	198.8	1.07	0.1641	0.0073	0.02154	0.00051	0.23361	0.0556	0.0025	0.21128	153.9	6.3	137.4	3.2	396	93	137.4	3.2	10.7212
	188-S142_30	127.2	0.965	0.1501	0.0073	0.02161	0.0005	0.036198	0.0504	0.0025	0.31538	141.6	6.4	137.8	3.1	203	99	137.8	3.1	2.68362
	188-S142_31	150	1.051	0.2185	0.01	0.02358	0.00058	0.056558	0.0675	0.0034	0.49362	200.1	8.4	150.2	3.6	805	110	150.2	3.6	24.9375
	188-S142_32	47.8	1.038	0.142	0.014	0.02152	0.00079	0.028046	0.0485	0.0051	0.26578	133	13	137.2	5	90	190	137.2	5	3.15789
	188-S142_33	149.2	1.094	0.1637	0.0086	0.02221	0.00051	0.042032	0.0533	0.0029	0.35315	153.5	7.4	141.6	3.2	320	110	141.6	3.2	7.75244
	188-S142_34	134.4	0.901	0.1716	0.0087	0.02092	0.00046	0.076561	0.0595	0.003	0.26254	160.2	7.5	133.5	2.9	526	110	133.5	2.9	16.6667
	188-S142_35	193	0.969	0.1898	0.011	0.02154	0.00047	0.30359	0.0643	0.0035	-0.045275	175.6	9	137.4	3	670	110	137.4	3	21.754
	188-S142_36	233	0.794	0.1521	0.0074	0.0202	0.00045	0.24097	0.0548	0.0026	0.13237	143.4	6.5	128.9	2.9	365	100	128.9	2.9	10.1116
	188-S142_37	157	1.006	0.156	0.011	0.02175	0.00051	0.00080291	0.0527	0.004	0.30247	146.9	9.9	138.7	3.2	270	150	138.7	3.2	5.58203
	188-S142_38	490	0.712	0.1499	0.005	0.02098	0.00039	0.27819	0.0519	0.0017	0.11287	141.6	4.4	133.8	2.4	267	70	133.8	2.4	5.50847
	188-S142_39	4.47	0.7	17.7	1.9	0.173	0.018	0.95948	0.737	0.035	0.00062172	2802	97	1007	91	4824	84	DISC	DISC	79.1252
	191-N46_1	224	1.129	0.1624	0.0083	0.02313	0.00051	0.10557	0.051	0.0026	0.22293	152.5	7.2	147.4	3.2	225	110	147.4	3.2	3.34426
	191-N46_2	259	2.71	0.2782	0.01	0.03781	0.00074	0.11472	0.0534	0.002	0.28925	248.8	8.1	239.2	4.6	328	82	239.2	4.6	3.85852
	191-N46_3	645	0.8025	0.1469	0.0076	0.0213	0.00043	0.080508	0.05	0.0026	0.20849	139	6.7	135.9	2.7	188	110	135.9	2.7	2.23022
	191-N46_4	118.2	1.071	0.1513	0.0071	0.02289	0.00053	0.014235	0.0485	0.0024	0.37667	142.6	6.3	145.9	3.4	120	96	145.9	3.4	2.31417
	191-N46_5	152.7	0.963	0.1585	0.0069	0.0232	0.00049	0.19267	0.0494	0.0021	0.1907	149	6	147.8	3.1	167	88	147.8	3.1	0.805369
	191-N46_6	81.4	0.946	0.1468	0.008	0.02254	0.00054	0.076798	0.0471	0.0026	0.33071	138.4	7.1	143.7	3.4	80	110	143.7	3.4	3.82948
	191-N46_7	95.7	1.416	0.151	0.0079	0.02152	0.0005	0.075243	0.0511	0.0027	0.25423	142.3	7	137.3	3.2	236	110	137.3	3.2	3.5137
	191-N46_8	111.7	1.328	0.1525	0.007	0.02236	0.00052	0.17374	0.0496	0.0023	0.23084	143.6	6.2	142.5	3.3	159	91	142.5	3.3	0.766017
	191-N46_9	153	0.901	0.1526	0.0069	0.02289	0.00055	0.23465	0.0485	0.0022	0.19154	144.4	5.9	145.9	3.5	130	88	145.9	3.5	1.03878
	191-N46_10	239.9	0.785	0.1459	0.0065	0.02152	0.00044	0.10248	0.0492	0.0022	0.25201	138	5.7	137.2	2.8	152	92	137.2	2.8	0.57971
	191-N46_11	82	1.164	0.1683	0.0096	0.02175	0.00055	0.18579	0.0564	0.0032	0.21603	156.8	8.3	138.7	3.5	380	110	138.7	3.5	11.5434
	191-N46_13	107.7	1.092	0.1558	0.0075	0.02234	0.00052	0.011323	0.0508	0.0026	0.38835	146.5	6.6	142.4	3.3	205	99	142.4	3.3	2.79863
	191-N46_14	174.6	0.871	0.1696	0.0096	0.02282	0.00053	0.092402	0.0535	0.003	0.18807	158.4	8.3	145.4	3.3	320	110	145.4	3.3	8.20707
	191-N46_15	225.3	1.525	0.207	0.0087	0.0281	0.00068	0.15023	0.0537	0.0023	0.33126	190.8	7.3	178.6	4.3	339	95	178.6	4.3	6.39413
	191-N46_16	268.5	0.808	0.1677	0.0076	0.0211	0.00046	0.020948	0.0579	0.0028	0.32657	158.1	6.9	134.6	2.9	486	100	134.6	2.9	14.864
	191-N46_17	176.9	1.065	0.283	0.02	0.02686	0.00064	0.27558	0.0758	0.0051	-0.0021332	253	16	170.8	4	1020	130	170.8	4	32.4901
	191-N46_18	154.3	1.047	0.1807	0.0089	0.02145	0.00045	0.042175	0.0603	0.003	0.27385	168.7	7.8	136.8	2.8	570	110	136.8	2.8	18.9093
	191-N46_19	115	1.058	0.1488	0.0085	0.02288	0.00066	0.099456	0.047	0.0028	0.32567	140.3	7.5	145.8	4.1	80	110	145.8	4.1	3.92017
	191-N46_20	114.3	1.139	0.1573	0.009	0.0221	0.00065	0.22696	0.051	0.0029	0.32799	147.9	7.8	140.9	4.1	230	120	140.9	4.1	4.73293
	191-N46_21	226.5	1.04	0.1544	0.0072	0.02202	0.00052	0.24495	0.0508	0.0024	0.17413	145.6	6.3	140.4	3.3	216	98	140.4	3.3	3.57143
	191-N46_22	357	5.59	0.275	0.013	0.03865	0.0011	0.03528	0.0509	0.0026	0.55636	246.2	11	244.4	6.9	250	120	244.4	6.9	0.731113
	191-N46_23	70.9	1.087	0.192	0.011	0.02469	0.00067	0.21319	0.0566	0.0033	0.17202	177.7	9.6	157.2	4.2	420	120	157.2	4.2	11.5363
	191-N46_24	203.1	0.884	0.1539	0.0064	0.02268	0.0005	0.015112	0.0493	0.0022	0.40512	145.1	5.6	144.6	3.2	155	87	144.6	3.2	0.34459
	191-N46_25	70.9	1.38	0.1603	0.0092	0.02322	0.00058	0.10453	0.0502	0.003	0.26701	150.1	8	147.9	3.7	170	110	147.9	3.7	1.46569
	191-N46_26	250.4	0.569	0.152	0.0062	0.02152	0.00043	0.24335	0.0514	0.0021	0.089934	143.3	5.4	137.2	2.7	235	83	137.2	2.7	4.2568
	191-N46_27	82.3	1.063	0.164	0.013	0.0209	0.00058	0.014889	0.0572	0.0045	0.25991	153	11	133.3	3.7	400	160	133.3	3.7	12.8758
	191-N46_28	901	4.27	0.812	0.022	0.07693	0.0016	0.59638	0.07625	0.002	0.3115	603.1	13	477.7	9.4	1098	55	477.7	9.4	20.7926
	191-N46_29	237	0.844	0.1632	0.007	0.0235	0.0006	0.26914	0.0507	0.0022	0.27992	153.2	6.1	149.7	3.7	211	91	149.7	3.7	2.2846
	191-N46_30	70.8	1.135	0.1612	0.0096	0.02326	0.00063	0.28493	0.0506	0.0029	0.014397	152.6	7.9	148.2	3.9	210	120	148.2	3.9	2.88336
	191-N46_31	263.1	3.77	0.3165	0.011	0.04315	0.00096	0.22098	0.0531	0.0019	0.43226	278.9	8.5	272.3	5.9	331	83	272.3	5.9	2.36644
	191-N46_32	184.3	1.298	0.154	0.0064	0.02238	0.00049	0.12753	0.0501	0.0022	0.28508	145.1	5.6	142.7	3.1	191	87	142.7	3.1	1.65403
	191-N46_33	174.3	0.884	0.151	0.0062	0.02211	0.00048	0.1164	0.0494	0.0021	0.31909	142.5	5.5	141	3	157	86	141	3	1.05263
	191-N46_34	738	5.34	0.1616	0.0062	0.02364	0.00054	0.16746	0.0494	0.002	0.37063	152	5.4	150.6	3.4	164	84	150.6	3.4	0.921053
	191-N46_35	153.7	1.046	0.1662	0.0081	0.02181	0.00047	0.15815	0.0549	0.0026	0.18823	155.5	7	139.1	3	372	100	139.1	3	10.5466
	191-N46_36	143.7	0.96	0.1465	0.0069	0.02141	0.00049	0.13657	0.0495	0.0024	0.25652	138.5	6.2	136.6	3.1	161	97	136.6	3.1	1.37184
	191-N46_37	112.9	0.914	0.145	0.0079	0.02226	0.00053	0.071774	0.0466	0.0025	0.39979	137	6.9	141.9	3.4	64	110	141.9	3.4	3.57664
	191-N46_38	870	3.449	0.9164	0.024	0.1077	0.002	0.60103	0.06115	0.0016	0.3505	660.1	13	659.1	12	642	55	659.1	12	0.151492
	191-N46_39	176.3	1.002	0.1657	0.0081	0.02404	0.00063	0.30916	0.0497	0.0024	0.19224	155.3	7	153.1	4	167	95	153.1	4	1.41661
	191-N46_40	182	1.013	0.1486	0.008	0.02266	0.00062	0.13056	0.0467	0.0025	0.34828	140.3	7.1	144.4	3.9	78	110	144.4	3.9	2.92231
	191-N46_41	227.4	0.851	0.1555	0.0065	0.02244	0.00049	0.060497	0.0502	0.0022	0.41619	146.5	5.7	143	3.1	190	89	143	3.1	2.38908
	201-SM482_1	252.1	0.818	0.1773	0.0061	0.02512	0.00042	0.045475	0.0509	0.0018	0.34167	165.9	5.1	159.9	2.6	232	74	159.9	2.6	3.61664
	201-SM482_2	545.6	0.631	0.1709	0.009	0.0252	0.0004	0.19505	0.0493	0.0023	0.18409	161.2	7.5	160.4	2.5	170	86	160.4	2.5	0.496278
	201-SM482_3	603	0.6268	0.1742	0.0049	0.02547	0.00038	0.1775	0.0494	0.0014	0.27529	162.7	4.3	162.1	2.4	165	58	162.1	2.4	0.368777
	201-SM482_4	566	0.633	0.1725	0.0052	0.02505	0.00036	0.030661	0.0499	0.0016	0.3341	161.2	4.5	159.5	2.3	175	64	159.5	2.3	1.05459
	201-SM482_5	549	1.85	0.1671	0.0064	0.02497	0.00043	0.094589	0.0484	0.0018	0.31582	156.6	5.5	159	2.7	112	73	159	2.7	1.53257
	201-SM482_6	132.4	0.819	0.1769	0.0092	0.02549	0.00049	0.021236	0.0504	0.0026	0.39562	164.4	8.1	162.3	3.1	180	100	162.3	3.1	1.27737
	201-SM482_7	1010	3.23	1.74	0.13	0.1581	0.0073	0.069329	0.0795	0.0021	0.46957	1020	38	946	39	1160	50	1160	50	18.4483
	201-SM482_8	212.4	0.6857	0.171	0.0073	0.02462	0.00044	0.1509	0.0505	0.0023	0.23499	159.5	6.3	156.8	2.7	187	86	156.8	2.7	1.69279
	201-SM482_9	204.6	0.68	0.166	0.0068	0.02469	0.00043	0.23268	0.0488	0.0021	0.11889	155.5	6.1	157.2	2.7	130	84	157.2	2.7	1.09325
	201-SM482_10	229.1	0.738	0.166	0.0071	0.02488	0.00042	0.005386	0.0478	0.0023	0.31979	155.6	6.2	158.4	2.6	110	89	158.4	2.6	1.79949
	201-SM482_11	658	0.5154	0.1699	0.0044	0.02496	0.00035	0.079993	0.0493	0.0013	0.33665	159.1	3.8	158.9	2.2	155	55	158.9	2.2	0.125707
	201-SM482_9	204.6	0.68	0.166	0.0068	0.02469	0.00043	0.23268	0.0488	0.0021	0.11889	155.5	6.1	157.2	2.7	130	84	157.2	2.7	1.09325
	201-SM482_10	229.1	0.738	0.166	0.0071	0.02488	0.00042	0.005386	0.0478	0.0023	0.31979	155.6	6.2	158.4	2.6	110	89	158.4	2.6	1.79949
	201-SM482_11	658	0.5154	0.1699	0.0044	0.02496	0.00035	0.079993	0.0493	0.0013	0.33665	159.1	3.8	158.9	2.2	155	55	158.9	2.2	0.125707
	201-SM482_12	309.3	0.839	0.2012	0.0073	0.02521	0.00041	0.053141	0.0582	0.0023	0.29159	185.5	6.2	160.5	2.6	480	81	160.5	2.6	13.4771
	201-SM482_13	656	0.591	0.1817	0.0054	0.02555	0.00036	0.26327	0.0514	0.0014	0.1233	169.2	4.6	162.6	2.3	243	58	162.6	2.3	3.90071
	201-SM482_14	273	0.8028	0.1792	0.0066	0.02503	0.00044	0.11105	0.0524	0.0021	0.33737	166.8	5.7	159.4	2.7	265	78	159.4	2.7	4.43645
	201-SM482_16	504	0.661	0.1706	0.02	0.02495	0.0004	0.1755	0.0492	0.0054	0.22392	159.6	15	158.8	2.5	157	140	158.8	2.5	0.501253
	201-SM482_17	450.2	0.6586	0.1751	0.0056	0.0258	0.00038	0.0081211	0.0493	0.0017	0.34697	163.4	4.8	164.2	2.4	153	66	164.2	2.4	0.489596
	201-SM482_18	584	0.6681	0.1685	0.005	0.02506	0.00035	0.096077	0.0487	0.0015	0.25208	157.8	4.4	159.6	2.2	131	61	159.6	2.2	1.14068
	201-SM482_19	809	0.55	0.1756	0.0047	0.02576	0.00041	0.34315	0.0492	0.0012	0.27592	164	4	163.9	2.6	151	50	163.9	2.6	0.0609756
	201-SM482_20	283	0.763	0.1859	0.027	0.02564	0.00052	0.044671	0.0529	0.0064	0.40013	172.4	21	163.2	3.3	280	150	163.2	3.3	5.33643
	201-SM482_21	461	1.109	0.1762	0.0053	0.02608	0.00039	0.021428	0.0491	0.0016	0.37878	164.5	4.5	166	2.4	155	65	166	2.4	0.911854
	201-SM482_22	309	0.91	0.1848	0.007	0.02658	0.00046	0.1004	0.0506	0.002	0.31317	171.5	6	169.1	2.9	199	78	169.1	2.9	1.39942
	201-SM482_23	310	0.7622	0.1753	0.0069	0.02536	0.00045	0.087115	0.0501	0.002	0.2794	163.4	5.9	161.4	2.8	196	80	161.4	2.8	1.22399
	201-SM482_24	235.9	0.811	0.2097	0.0087	0.02506	0.00043	0.12568	0.0605	0.0025	0.21563	192.3	7.3	159.5	2.7	560	86	159.5	2.7	17.0567
	201-SM482_25	195	0.937	0.1746	0.0076	0.02501	0.00047	0.001114	0.0505	0.0023	0.32925	162.7	6.6	159.2	2.9	210	87	159.2	2.9	2.1512
	201-SM482_26	833	0.541	0.1731	0.0044	0.02473	0.00034	0.17981	0.0509	0.0013	0.24314	162.3	3.9	157.5	2.2	223	55	157.5	2.2	2.95749
	201-SM482_27	153.6	0.7721	0.176	0.01	0.02495	0.00049	0.049126	0.0518	0.0029	0.27028	163.6	8.6	158.9	3.1	250	110	158.9	3.1	2.87286
	201-SM482_28	239	1.105	0.185	0.014	0.02553	0.00046	0.071513	0.0529	0.0042	0.36444	171.2	12	162.5	2.9	280	120	162.5	2.9	5.08178
	201-SM482_29	920	0.5048	0.1831	0.0042	0.02647	0.00035	0.10281	0.0503	0.0012	0.30139	170.5	3.6	168.4	2.2	199	50	168.4	2.2	1.23167
	201-SM482_30	310	0.804	0.167	0.0062	0.02503	0.00039	0.12178	0.0487	0.0018	0.24474	157.3	5.5	159.3	2.5	151	72	159.3	2.5	1.27146
	201-SM482_31	281.1	0.7532	0.168	0.0067	0.02491	0.00042	0.17111	0.0492	0.002	0.1943	157.1	5.8	158.6	2.7	152	78	158.6	2.7	0.954806
	201-SM482_32	578	0.656	0.1695	0.0052	0.02506	0.00035	0.12568	0.0493	0.0015	0.24358	158.7	4.5	159.6	2.2	153	63	159.6	2.2	0.567108
	201-SM482_33	274.7	4	0.317	0.014	0.04023	0.0009	0.39966	0.0575	0.0021	-0.12714	278	10	254.3	5.6	470	75	254.3	5.6	8.52518
	201-SM482_34	249	4.3	0.856	0.16	0.1002	0.0087	0.28463	0.0621	0.0029	0.26356	626	54	615	48	652	74	615	48	1.75719
	201-SM482_35	553	0.6268	0.1749	0.0051	0.02536	0.00038	0.13829	0.0502	0.0015	0.25849	163.3	4.4	161.4	2.4	190	61	161.4	2.4	1.1635
	201-SM482_36	328.6	0.85	0.1729	0.0059	0.02536	0.00039	0.12076	0.0497	0.0018	0.26149	161.5	5.1	161.5	2.5	175	71	161.5	2.5	0
	201-SM482_37	174.4	0.978	0.197	0.027	0.02541	0.00056	0.33764	0.0564	0.0067	0.016109	182	20	161.7	3.5	410	150	161.7	3.5	11.1538
	201-SM482_38	312	0.777	0.227	0.01	0.02594	0.0005	0.009517	0.0641	0.0033	0.48575	207	8.3	165.1	3.1	680	99	165.1	3.1	20.2415
	201-SM482_39	291.7	0.6657	0.1766	0.0067	0.02496	0.00044	0.019875	0.0519	0.0021	0.35882	164.6	5.8	158.9	2.8	253	80	158.9	2.8	3.46294
	201-SM482_40	381.6	0.745	0.1713	0.0058	0.02545	0.00038	0.10137	0.049	0.0017	0.27469	160.1	5	162	2.4	149	69	162	2.4	1.18676
	201-SM482_41	123	1.318	0.1427	0.009	0.02065	0.00051	0.034857	0.051	0.0034	0.31271	136.3	8.3	131.7	3.2	190	120	131.7	3.2	3.37491
	201-SM482_42	111.8	1.275	0.139	0.0099	0.0209	0.00053	0.063246	0.0497	0.0036	0.25083	130.7	8.7	133.3	3.3	120	130	133.3	3.3	1.98929
	201-SM482_43	182.3	1.086	0.1755	0.0079	0.02505	0.00046	0.21459	0.051	0.0023	0.11754	163.4	6.9	159.5	2.9	226	90	159.5	2.9	2.38678
	201-SM482_44	94.2	1.042	0.205	0.015	0.02527	0.00055	0.12975	0.0592	0.0046	0.20137	188	12	161.5	3.5	470	130	161.5	3.5	14.0957
	201-SM482_45	240	0.728	0.1726	0.008	0.02548	0.00045	0.065053	0.0497	0.0025	0.34523	160.8	6.9	162.2	2.8	163	94	162.2	2.8	0.870647
	201-SM482_46	627	0.659	0.1724	0.0049	0.02545	0.00038	0.12262	0.0492	0.0014	0.27345	161.2	4.3	162	2.4	166	61	162	2.4	0.496278
	201-SM482_47	567	0.4716	0.1857	0.0067	0.02595	0.00037	0.061871	0.052	0.0019	0.38561	172.6	5.6	165.2	2.3	280	69	165.2	2.3	4.28737
	201-SM482_48	253.9	0.687	0.1754	0.023	0.02573	0.00055	0.11743	0.0498	0.0055	0.26521	163.5	18	163.7	3.5	170	150	163.7	3.5	0.122324
	201-SM482_49	141.5	0.726	0.142	0.0095	0.02111	0.00051	0.23234	0.0496	0.0032	0.14247	135.1	8.3	134.7	3.3	160	110	134.7	3.3	0.296077
	201-SM482_50	251.4	0.793	0.1752	0.011	0.02433	0.0005	0.099566	0.0527	0.0029	0.4207	163.2	9.1	155	3.1	272	110	155	3.1	5.02451
	201-SM458_25um_1	214	0.508	0.193	0.015	0.02481	0.00083	0.17081	0.0562	0.0038	0.12251	178	12	157.9	5.2	420	140	157.9	5.2	11.2921
	201-SM458_25um_2	501	0.76	0.1967	0.0069	0.02407	0.00048	0.22833	0.0592	0.002	0.33381	182	5.9	153.3	3	549	75	153.3	3	15.7692
	201-SM458_25um_3	725	4.18	0.1705	0.0048	0.02254	0.00038	0.34487	0.055	0.0014	0.19895	159.7	4.1	143.7	2.4	394	55	143.7	2.4	10.0188
	201-SM458_25um_4	93.5	0.758	0.1743	0.0085	0.02541	0.00057	0.023106	0.0504	0.0026	0.42965	162.3	7.4	161.7	3.6	200	100	161.7	3.6	0.369686
	201-SM458_25um_5	196.1	0.5281	0.1735	0.009	0.02449	0.00049	0.079934	0.0517	0.0029	0.38303	162	7.7	156	3.1	240	110	156	3.1	3.7037
	201-SM458_25um_6	726	0.6634	0.1792	0.0044	0.0251	0.00038	0.25228	0.052	0.0012	0.23724	167.2	3.7	159.8	2.4	273	49	159.8	2.4	4.42584
	201-SM458_25um_7	336	0.706	0.1725	0.0069	0.02557	0.0005	0.15837	0.0499	0.0021	0.25536	162.3	6.3	162.8	3.1	175	84	162.8	3.1	0.308071
	201-SM458_25um_8	309	0.931	0.1929	0.01	0.02619	0.00046	0.10062	0.0537	0.0028	0.18577	178.5	8.5	166.6	2.9	320	110	166.6	2.9	6.66667
	201-SM458_25um_9	3150	0.4888	0.285	0.011	0.02738	0.00038	0.25216	0.0757	0.0027	0.013026	254.2	8.7	174.1	2.4	1053	73	174.1	2.4	31.5106
	201-SM458_25um_10	315.9	0.76	0.178	0.0085	0.02484	0.00051	0.024254	0.0522	0.0026	0.33654	166	7.3	158.2	3.2	270	100	158.2	3.2	4.6988
	201-SM458_25um_11	1040	2.79	0.1762	0.0061	0.02597	0.0005	0.010566	0.0488	0.0019	0.43063	164.5	5.3	165.3	3.2	146	78	165.3	3.2	0.486322
	201-SM458_25um_12	121.7	0.742	0.172	0.0093	0.02539	0.00061	0.068898	0.0495	0.0028	0.3285	161.7	7.8	161.6	3.8	160	110	161.6	3.8	0.0618429
	201-SM458_25um_13	596	0.536	0.1932	0.0071	0.02602	0.00045	0.27582	0.0541	0.0019	0.13218	180	6.3	165.6	2.8	344	74	165.6	2.8	8
	201-SM458_25um_14	241	0.5702	0.1771	0.0071	0.02522	0.00043	0.011936	0.0511	0.0021	0.34348	165.1	6.1	160.6	2.7	219	83	160.6	2.7	2.72562
	201-SM458_25um_15	2430	0.897	0.1786	0.0086	0.02517	0.0008	0.23823	0.0513	0.0025	0.38485	166.7	7.4	160.2	5	240	110	160.2	5	3.89922
	201-SM458_25um_16	826	0.4214	0.1715	0.0047	0.02529	0.00039	0.38014	0.049	0.0012	0.1074	160.6	4.1	161	2.4	145	52	161	2.4	0.249066
	201-SM458_25um_17	175.8	0.6202	0.204	0.011	0.02553	0.00053	0.22163	0.0585	0.0032	0.086415	187.6	9.2	162.5	3.3	490	110	162.5	3.3	13.3795
	201-SM458_25um_18	563	0.563	0.2012	0.0074	0.02607	0.00042	0.099051	0.056	0.002	0.24741	185.8	6.2	165.9	2.6	418	78	165.9	2.6	10.7104
	201-SM458_25um_19	660	0.708	0.1996	0.0056	0.02638	0.00041	0.12899	0.0546	0.0015	0.34098	184.6	4.7	167.8	2.6	382	61	167.8	2.6	9.10076
	201-SM458_25um_20	92.5	0.765	0.174	0.0099	0.02617	0.00063	0.086386	0.0487	0.0028	0.27407	162.9	8.8	166.5	4	130	110	166.5	4	2.20994
	201-SM458_25um_21	346.6	0.845	0.0519	0.0036	0.00819	0.0002	0.056669	0.047	0.0035	0.29148	51.3	3.5	52.6	1.3	40	130	52.6	1.3	2.53411
	201-SM458_25um_22	99.9	0.656	0.178	0.011	0.02561	0.00059	0.0061301	0.0508	0.0033	0.3077	165.3	9.5	163.6	3.9	190	120	163.6	3.9	1.02843
	201-SM458_25um_23	443	0.786	0.1762	0.005	0.02585	0.0004	0.07564	0.0497	0.0014	0.35843	164.6	4.3	164.5	2.5	173	56	164.5	2.5	0.0607533
	201-SM458_25um_24	250	0.68	0.1744	0.0061	0.02583	0.00045	0.18218	0.0497	0.0017	0.2801	163.5	5.4	164.4	2.8	171	69	164.4	2.8	0.550459
	201-SM458_25um_25	119	0.834	0.18	0.01	0.02567	0.00051	0.059805	0.0522	0.0032	0.25716	167.2	9	163.4	3.2	230	110	163.4	3.2	2.27273
	201-SM458_25um_26	343	0.874	0.1739	0.0059	0.02536	0.00042	0.16508	0.0505	0.0017	0.24705	163.1	5.2	161.4	2.7	202	68	161.4	2.7	1.04231
	201-SM458_25um_27	88.4	0.771	0.182	0.01	0.02606	0.00062	0.031231	0.051	0.0029	0.34728	169.1	8.9	165.8	3.9	220	110	165.8	3.9	1.95151
	201-SM458_25um_28	133.1	0.665	0.1739	0.0084	0.02598	0.00054	0.014182	0.049	0.0024	0.35864	162.1	7.3	165.3	3.4	162	99	165.3	3.4	1.97409
	201-SM458_25um_29	94.1	0.784	0.18	0.011	0.02595	0.00066	0.12431	0.0512	0.0032	0.22113	166.9	9.6	165.1	4.2	220	120	165.1	4.2	1.07849
	201-SM458_25um_30	149	0.5768	0.1735	0.0094	0.02559	0.00052	0.084179	0.0494	0.0027	0.21802	161.8	8.1	162.9	3.2	150	100	162.9	3.2	0.679852
	201-SM458_25um_31	590	0.6434	0.1756	0.0042	0.02561	0.00037	0.1697	0.0498	0.0012	0.27984	164.1	3.7	163	2.3	176	52	163	2.3	0.670323
	201-SM458_25um_32	183.3	0.4847	0.1801	0.0081	0.02564	0.00045	0.13605	0.051	0.0022	0.17716	167.4	7	163.2	2.9	216	87	163.2	2.9	2.50896
	201-SM458_25um_33	282.6	0.5499	0.178	0.0067	0.02547	0.00043	0.13152	0.0509	0.0019	0.27104	165.9	5.7	162.1	2.7	214	76	162.1	2.7	2.29054
	201-SM458_25um_34	2021	0.4057	0.1818	0.0036	0.02672	0.00036	0.40748	0.04946	0.00078	0.14183	169.5	3.1	170	2.3	166	35	170	2.3	0.294985
	201-SM458_25um_35	125.3	0.575	0.21	0.012	0.0262	0.00068	0.27777	0.0581	0.0031	0.14489	192.3	9.7	166.7	4.3	490	110	166.7	4.3	13.3125
	201-SM458_25um_36	458	0.6703	0.1799	0.0057	0.02544	0.00039	0.37649	0.0515	0.0015	0.019434	168.5	5.1	162	2.4	248	62	162	2.4	3.85757
	201-SM458_25um_37	301	0.891	0.1767	0.0066	0.02551	0.00039	0.0030299	0.0504	0.0019	0.33296	164.8	5.6	162.3	2.5	193	75	162.3	2.5	1.51699
	201-SM458_25um_38	1359	0.5728	0.1795	0.0038	0.02641	0.00036	0.24628	0.04932	0.00091	0.25957	167.5	3.3	168.1	2.3	160	40	168.1	2.3	0.358209
	201-SM458_25um_39	123.7	0.682	0.206	0.018	0.0257	0.00096	0.23846	0.0588	0.006	0.51455	189	15	163.6	6	470	210	163.6	6	13.4392
	201-SM458_25um_40	250.5	0.785	0.224	0.017	0.02691	0.00061	0.14971	0.0607	0.0044	0.13554	204	14	171.1	3.8	560	150	171.1	3.8	16.1275
	201-SM458_25um_41	169.8	0.583	0.184	0.011	0.02618	0.0006	0.058387	0.05	0.0026	0.27809	172.5	9.4	166.6	3.8	230	120	166.6	3.8	3.42029
	201-SM458_25um_42	167.1	0.6058	0.178	0.0066	0.02619	0.00049	0.0061726	0.0495	0.0019	0.42254	165.9	5.7	166.7	3	172	76	166.7	3	0.482218
	201-SM458_25um_43	205	1.44	0.1832	0.0098	0.02668	0.00063	0.096781	0.0504	0.0028	0.304	170.2	8.4	169.7	4	200	110	169.7	4	0.293772
	201-SM458_25um_44	802	0.4735	0.1742	0.0044	0.02564	0.00039	0.32825	0.0495	0.0011	0.23912	162.9	3.8	163.2	2.5	172	48	163.2	2.5	0.184162
	201-SM458_25um_45	137.6	0.615	0.1729	0.0087	0.02523	0.00046	0.081879	0.0502	0.0026	0.34324	161.1	7.5	160.6	2.9	190	100	160.6	2.9	0.310366
	201-SM458_25um_46	307.3	0.5413	0.1774	0.0055	0.02574	0.00044	0.17506	0.0501	0.0015	0.28072	165.5	4.7	163.8	2.8	197	62	163.8	2.8	1.02719
	201-SM458_25um_47	288	0.561	0.1806	0.0071	0.02554	0.00045	0.13703	0.0516	0.002	0.20119	168.1	6.1	162.5	2.8	257	80	162.5	2.8	3.33135
	201-SM458_25um_48	293	0.5037	0.1763	0.0066	0.02572	0.00042	0.078075	0.0499	0.0019	0.23329	164.4	5.7	163.7	2.6	179	74	163.7	2.6	0.425791
	201-SM458_25um_49	165.9	0.531	0.181	0.014	0.026	0.00085	0.24699	0.0505	0.0037	0.12246	168	12	165.4	5.3	190	140	165.4	5.3	1.54762
	201-SM458_25um_50	385.6	0.5213	0.1788	0.0054	0.0259	0.00044	0.084359	0.0502	0.0015	0.38182	166.7	4.6	164.8	2.8	188	63	164.8	2.8	1.13977
	201-SM458_25um_51	168.4	0.729	0.227	0.014	0.02636	0.00075	0.11119	0.0628	0.004	0.33792	207	12	167.7	4.7	630	140	167.7	4.7	18.9855
	201-SM458_25um_52	341	1.164	0.1796	0.006	0.02626	0.00046	0.15109	0.0492	0.0015	0.32415	167.4	5.1	167.1	2.9	157	65	167.1	2.9	0.179211
	201-SM458_25um_53	1159	0.5457	0.1753	0.0039	0.02555	0.00035	0.36366	0.04967	0.00091	0.1189	163.9	3.3	162.6	2.2	174	39	162.6	2.2	0.793167
	201-SM458_25um_54	520	0.4983	0.1775	0.0049	0.02532	0.00039	0.2498	0.0507	0.0013	0.20668	165.6	4.2	161.2	2.5	215	54	161.2	2.5	2.657
	201-SM458_25um_55	120.3	0.648	0.1784	0.0097	0.02613	0.00054	0.051978	0.05	0.0028	0.29857	165.6	8.3	166.3	3.4	180	110	166.3	3.4	0.422705
	201-SM458_25um_56	211.3	0.882	0.1716	0.0067	0.02511	0.00046	0.0043239	0.0493	0.0019	0.43214	160.3	5.8	159.9	2.9	161	78	159.9	2.9	0.249532
	201-SM458_25um_57	148.2	0.5473	0.1748	0.0089	0.02501	0.00051	0.067469	0.0508	0.0026	0.26437	162.7	7.6	159.2	3.2	206	98	159.2	3.2	2.1512
	201-SM458_25um_58	96.6	0.745	0.181	0.014	0.02581	0.00098	0.26235	0.0514	0.004	0.19269	168	12	164.2	6.2	220	150	164.2	6.2	2.2619
	201-SM458_25um_59	209.4	0.585	0.1684	0.0076	0.02535	0.00048	0.021096	0.0484	0.0023	0.36583	157.5	6.6	161.4	3	115	91	161.4	3	2.47619
	201-SM458_25um_60	538	0.85	0.2049	0.0072	0.02523	0.00047	0.024101	0.0592	0.0022	0.40313	188.8	6	160.6	2.9	526	77	160.6	2.9	14.9364
	201-SM458_25um_61	691	0.4808	0.1737	0.005	0.02547	0.00039	0.24	0.0496	0.0013	0.21227	162.4	4.3	162.1	2.5	167	55	162.1	2.5	0.184729
	201-SM458_25um_62	1254	0.431	0.1874	0.0043	0.02579	0.00039	0.31667	0.0529	0.0011	0.086432	174.2	3.7	164.1	2.4	322	48	164.1	2.4	5.79793
	201-SM458_15um_1	101.9	1.493	0.234	0.035	0.0257	0.0011	0.11976	0.066	0.01	0.099568	208	28	163.3	7.1	610	300	163.3	7.1	21.4904
	201-SM458_15um_2	502	3.64	0.199	0.011	0.02524	0.00064	0.29798	0.0572	0.0033	0.078304	183.3	9.4	160.6	4	460	120	160.6	4	12.3841
	201-SM458_15um_3	1070	3.91	0.1815	0.0095	0.02635	0.00073	0.30423	0.05	0.0027	0.1682	169	8.1	167.6	4.6	190	110	167.6	4.6	0.828402
	201-SM458_15um_4	2140	9.67	0.1688	0.0072	0.02434	0.00094	0.40034	0.0513	0.0026	0.46689	158.2	6.3	155	5.9	240	110	155	5.9	2.02276
	201-SM458_15um_5	504	2.42	0.184	0.011	0.02571	0.00098	0.52753	0.0534	0.0031	0.026182	171.4	9.3	163.6	6.2	320	120	163.6	6.2	4.55076
	201-SM458_15um_6	354	2.17	0.166	0.011	0.0243	0.00067	0.056765	0.0495	0.0037	0.44602	155.1	9.5	154.8	4.2	150	140	154.8	4.2	0.193424
	201-SM458_15um_7	682	2.29	0.181	0.016	0.02448	0.00099	0.52013	0.055	0.0047	0.018455	168	14	155.9	6.2	370	180	155.9	6.2	7.20238
	201-SM458_15um_8	596	2.7	0.266	0.022	0.02485	0.00072	0.22314	0.0774	0.0062	0.1076	238	17	158.2	4.5	1030	160	158.2	4.5	33.5294
	201-SM458_15um_9	184.8	2.61	0.202	0.018	0.02451	0.00099	0.19454	0.0602	0.0054	0.25314	185	15	156.1	6.3	520	190	156.1	6.3	15.6216
	201-SM458_15um_10	1281	1.01	0.1385	0.0046	0.02152	0.0006	0.28354	0.0505	0.0021	0.48208	131.6	4.1	137.2	3.8	210	86	137.2	3.8	4.25532
	201-SM458_15um_11	343	11.7	0.209	0.018	0.0258	0.0013	0.32343	0.0605	0.0053	0.17232	192	15	163.9	7.9	550	190	163.9	7.9	14.6354
	201-SM458_15um_12	3400	18.57	0.1778	0.0049	0.02428	0.00047	0.53174	0.0527	0.0016	0.054687	166	4.2	154.7	3	306	66	154.7	3	6.80723
	201-SM458_15um_13	308	2.264	0.208	0.014	0.02767	0.00089	0.23865	0.0551	0.0038	0.19094	191	11	175.9	5.6	380	140	175.9	5.6	7.90576
	201-SM458_15um_14	440	2.109	0.194	0.013	0.02606	0.00069	0.24735	0.0543	0.0036	0.15545	179	11	165.8	4.3	320	130	165.8	4.3	7.3743
	201-SM458_15um_15	1245	2.32	0.233	0.015	0.02553	0.00093	0.088148	0.0679	0.0051	0.37312	212	13	162.5	5.8	810	160	162.5	5.8	23.3491
	201-SM458_15um_16	2480	6.39	0.1749	0.0072	0.02549	0.0008	0.1996	0.0505	0.0024	0.40982	163.5	6.2	162.2	5	229	110	162.2	5	0.795107
	201-SM458_15um_17	1050	8.7	0.177	0.014	0.02287	0.00097	0.12453	0.0582	0.0057	0.43952	165	12	145.7	6.1	470	180	145.7	6.1	11.697
	201-SM458_15um_18	387	2.07	0.192	0.011	0.02515	0.00075	0.26685	0.0561	0.0034	0.23306	177.3	9.2	160.1	4.7	400	120	160.1	4.7	9.70107
	201-SM458_15um_19	491	3.629	0.222	0.01	0.02438	0.00064	0.1243	0.0655	0.0033	0.30952	203.2	8.3	155.2	4	752	110	155.2	4	23.622
	201-SM458_15um_20	317	2.39	0.247	0.023	0.02482	0.00087	0.308	0.0737	0.0071	0.057299	221	18	158	5.5	900	180	158	5.5	28.5068
	201-SM458_15um_21	1420	12.8	0.17	0.011	0.02468	0.00089	0.35431	0.0509	0.0033	0.16062	159.2	9.5	157.2	5.6	250	150	157.2	5.6	1.25628
	201-SM458_15um_22	523	3.32	0.1983	0.0087	0.02566	0.00084	0.12077	0.056	0.0027	0.41372	183.2	7.4	163.3	5.3	450	110	163.3	5.3	10.8624
	0	0	0	0	0	0	0	0	0	0	0	0	0	0	0	0	0	#DIV/0!	#DIV/0!	#DIV/0!	Core
	0	0	0	0	0	0	0	0	0	0	0	0	0	0	0	0	0	#DIV/0!	#DIV/0!	#DIV/0!	Core
	0	0	0	0	0	0	0	0	0	0	0	0	0	0	0	0	0	#DIV/0!	#DIV/0!	#DIV/0!	Core
	0	0	0	0	0	0	0	0	0	0	0	0	0	0	0	0	0	#DIV/0!	#DIV/0!	#DIV/0!	Core
	0	0	0	0	0	0	0	0	0	0	0	0	0	0	0	0	0	#DIV/0!	#DIV/0!	#DIV/0!	Core
	0	0	0	0	0	0	0	0	0	0	0	0	0	0	0	0	0	#DIV/0!	#DIV/0!	#DIV/0!	Core
	0	0	0	0	0	0	0	0	0	0	0	0	0	0	0	0	0	#DIV/0!	#DIV/0!	#DIV/0!	Core
	0	0	0	0	0	0	0	0	0	0	0	0	0	0	0	0	0	#DIV/0!	#DIV/0!	#DIV/0!	Core
	0	0	0	0	0	0	0	0	0	0	0	0	0	0	0	0	0	#DIV/0!	#DIV/0!	#DIV/0!	Core
	0	0	0	0	0	0	0	0	0	0	0	0	0	0	0	0	0	#DIV/0!	#DIV/0!	#DIV/0!	Core
	0	0	0	0	0	0	0	0	0	0	0	0	0	0	0	0	0	#DIV/0!	#DIV/0!	#DIV/0!	Core
	0	0	0	0	0	0	0	0	0	0	0	0	0	0	0	0	0	#DIV/0!	#DIV/0!	#DIV/0!	Core
	0	0	0	0	0	0	0	0	0	0	0	0	0	0	0	0	0	#DIV/0!	#DIV/0!	#DIV/0!	Core
	0	0	0	0	0	0	0	0	0	0	0	0	0	0	0	0	0	#DIV/0!	#DIV/0!	#DIV/0!	Core
	0	0	0	0	0	0	0	0	0	0	0	0	0	0	0	0	0	#DIV/0!	#DIV/0!	#DIV/0!	Core
	0	0	0	0	0	0	0	0	0	0	0	0	0	0	0	0	0	#DIV/0!	#DIV/0!	#DIV/0!	Core
	0	0	0	0	0	0	0	0	0	0	0	0	0	0	0	0	0	#DIV/0!	#DIV/0!	#DIV/0!	Core
	0	0	0	0	0	0	0	0	0	0	0	0	0	0	0	0	0	#DIV/0!	#DIV/0!	#DIV/0!	Core
	0	0	0	0	0	0	0	0	0	0	0	0	0	0	0	0	0	#DIV/0!	#DIV/0!	#DIV/0!	Core
	0	0	0	0	0	0	0	0	0	0	0	0	0	0	0	0	0	#DIV/0!	#DIV/0!	#DIV/0!	Core
	0	0	0	0	0	0	0	0	0	0	0	0	0	0	0	0	0	#DIV/0!	#DIV/0!	#DIV/0!	Core
	0	0	0	0	0	0	0	0	0	0	0	0	0	0	0	0	0	#DIV/0!	#DIV/0!	#DIV/0!	Core
	0	0	0	0	0	0	0	0	0	0	0	0	0	0	0	0	0	#DIV/0!	#DIV/0!	#DIV/0!	Core
	0	0	0	0	0	0	0	0	0	0	0	0	0	0	0	0	0	#DIV/0!	#DIV/0!	#DIV/0!	Core
	0	0	0	0	0	0	0	0	0	0	0	0	0	0	0	0	0	#DIV/0!	#DIV/0!	#DIV/0!	Core
	0	0	0	0	0	0	0	0	0	0	0	0	0	0	0	0	0	#DIV/0!	#DIV/0!	#DIV/0!	Core
	0	0	0	0	0	0	0	0	0	0	0	0	0	0	0	0	0	#DIV/0!	#DIV/0!	#DIV/0!	Core
	0	0	0	0	0	0	0	0	0	0	0	0	0	0	0	0	0	#DIV/0!	#DIV/0!	#DIV/0!	Core
	0	0	0	0	0	0	0	0	0	0	0	0	0	0	0	0	0	#DIV/0!	#DIV/0!	#DIV/0!	Core
	0	0	0	0	0	0	0	0	0	0	0	0	0	0	0	0	0	#DIV/0!	#DIV/0!	#DIV/0!	Core
	0	0	0	0	0	0	0	0	0	0	0	0	0	0	0	0	0	#DIV/0!	#DIV/0!	#DIV/0!	Core
	0	0	0	0	0	0	0	0	0	0	0	0	0	0	0	0	0	#DIV/0!	#DIV/0!	#DIV/0!	Core
	0	0	0	0	0	0	0	0	0	0	0	0	0	0	0	0	0	#DIV/0!	#DIV/0!	#DIV/0!	Core
	0	0	0	0	0	0	0	0	0	0	0	0	0	0	0	0	0	#DIV/0!	#DIV/0!	#DIV/0!	Core
	0	0	0	0	0	0	0	0	0	0	0	0	0	0	0	0	0	#DIV/0!	#DIV/0!	#DIV/0!	Core
	0	0	0	0	0	0	0	0	0	0	0	0	0	0	0	0	0	#DIV/0!	#DIV/0!	#DIV/0!	Core
	0	0	0	0	0	0	0	0	0	0	0	0	0	0	0	0	0	#DIV/0!	#DIV/0!	#DIV/0!	Core
	0	0	0	0	0	0	0	0	0	0	0	0	0	0	0	0	0	#DIV/0!	#DIV/0!	#DIV/0!	Core
	0	0	0	0	0	0	0	0	0	0	0	0	0	0	0	0	0	#DIV/0!	#DIV/0!	#DIV/0!	Core
	0	0	0	0	0	0	0	0	0	0	0	0	0	0	0	0	0	#DIV/0!	#DIV/0!	#DIV/0!	Core
	0	0	0	0	0	0	0	0	0	0	0	0	0	0	0	0	0	#DIV/0!	#DIV/0!	#DIV/0!	Core
	0	0	0	0	0	0	0	0	0	0	0	0	0	0	0	0	0	#DIV/0!	#DIV/0!	#DIV/0!	Core
	0	0	0	0	0	0	0	0	0	0	0	0	0	0	0	0	0	#DIV/0!	#DIV/0!	#DIV/0!	Core
	0	0	0	0	0	0	0	0	0	0	0	0	0	0	0	0	0	#DIV/0!	#DIV/0!	#DIV/0!	Core
	0	0	0	0	0	0	0	0	0	0	0	0	0	0	0	0	0	#DIV/0!	#DIV/0!	#DIV/0!	Core
	0	0	0	0	0	0	0	0	0	0	0	0	0	0	0	0	0	#DIV/0!	#DIV/0!	#DIV/0!	Core
	0	0	0	0	0	0	0	0	0	0	0	0	0	0	0	0	0	#DIV/0!	#DIV/0!	#DIV/0!	Core
	0	0	0	0	0	0	0	0	0	0	0	0	0	0	0	0	0	#DIV/0!	#DIV/0!	#DIV/0!	Core
	0	0	0	0	0	0	0	0	0	0	0	0	0	0	0	0	0	#DIV/0!	#DIV/0!	#DIV/0!	Core
	0	0	0	0	0	0	0	0	0	0	0	0	0	0	0	0	0	#DIV/0!	#DIV/0!	#DIV/0!	Core
	0	0	0	0	0	0	0	0	0	0	0	0	0	0	0	0	0	#DIV/0!	#DIV/0!	#DIV/0!	Core
	0	0	0	0	0	0	0	0	0	0	0	0	0	0	0	0	0	#DIV/0!	#DIV/0!	#DIV/0!	Core
	0	0	0	0	0	0	0	0	0	0	0	0	0	0	0	0	0	#DIV/0!	#DIV/0!	#DIV/0!	Core
	0	0	0	0	0	0	0	0	0	0	0	0	0	0	0	0	0	#DIV/0!	#DIV/0!	#DIV/0!	Core
	0	0	0	0	0	0	0	0	0	0	0	0	0	0	0	0	0	#DIV/0!	#DIV/0!	#DIV/0!	Core
	0	0	0	0	0	0	0	0	0	0	0	0	0	0	0	0	0	#DIV/0!	#DIV/0!	#DIV/0!	Core
	0	0	0	0	0	0	0	0	0	0	0	0	0	0	0	0	0	#DIV/0!	#DIV/0!	#DIV/0!	Core
	0	0	0	0	0	0	0	0	0	0	0	0	0	0	0	0	0	#DIV/0!	#DIV/0!	#DIV/0!	Core
	0	0	0	0	0	0	0	0	0	0	0	0	0	0	0	0	0	#DIV/0!	#DIV/0!	#DIV/0!	Core
	0	0	0	0	0	0	0	0	0	0	0	0	0	0	0	0	0	#DIV/0!	#DIV/0!	#DIV/0!	Core
	0	0	0	0	0	0	0	0	0	0	0	0	0	0	0	0	0	#DIV/0!	#DIV/0!	#DIV/0!	Core
	0	0	0	0	0	0	0	0	0	0	0	0	0	0	0	0	0	#DIV/0!	#DIV/0!	#DIV/0!	Core
	0	0	0	0	0	0	0	0	0	0	0	0	0	0	0	0	0	#DIV/0!	#DIV/0!	#DIV/0!	Core
	0	0	0	0	0	0	0	0	0	0	0	0	0	0	0	0	0	#DIV/0!	#DIV/0!	#DIV/0!	Core
	0	0	0	0	0	0	0	0	0	0	0	0	0	0	0	0	0	#DIV/0!	#DIV/0!	#DIV/0!	Core
	0	0	0	0	0	0	0	0	0	0	0	0	0	0	0	0	0	#DIV/0!	#DIV/0!	#DIV/0!	Core
	0	0	0	0	0	0	0	0	0	0	0	0	0	0	0	0	0	#DIV/0!	#DIV/0!	#DIV/0!	Core
	0	0	0	0	0	0	0	0	0	0	0	0	0	0	0	0	0	#DIV/0!	#DIV/0!	#DIV/0!	Core
	0	0	0	0	0	0	0	0	0	0	0	0	0	0	0	0	0	#DIV/0!	#DIV/0!	#DIV/0!	Core
	0	0	0	0	0	0	0	0	0	0	0	0	0	0	0	0	0	#DIV/0!	#DIV/0!	#DIV/0!	Core
	0	0	0	0	0	0	0	0	0	0	0	0	0	0	0	0	0	#DIV/0!	#DIV/0!	#DIV/0!	Core
	0	0	0	0	0	0	0	0	0	0	0	0	0	0	0	0	0	#DIV/0!	#DIV/0!	#DIV/0!	Core
	0	0	0	0	0	0	0	0	0	0	0	0	0	0	0	0	0	#DIV/0!	#DIV/0!	#DIV/0!	Core
	0	0	0	0	0	0	0	0	0	0	0	0	0	0	0	0	0	#DIV/0!	#DIV/0!	#DIV/0!	Core
	0	0	0	0	0	0	0	0	0	0	0	0	0	0	0	0	0	#DIV/0!	#DIV/0!	#DIV/0!	Core
	0	0	0	0	0	0	0	0	0	0	0	0	0	0	0	0	0	#DIV/0!	#DIV/0!	#DIV/0!	Core
	0	0	0	0	0	0	0	0	0	0	0	0	0	0	0	0	0	#DIV/0!	#DIV/0!	#DIV/0!	Core
	0	0	0	0	0	0	0	0	0	0	0	0	0	0	0	0	0	#DIV/0!	#DIV/0!	#DIV/0!	Core
	0	0	0	0	0	0	0	0	0	0	0	0	0	0	0	0	0	#DIV/0!	#DIV/0!	#DIV/0!	Core
	0	0	0	0	0	0	0	0	0	0	0	0	0	0	0	0	0	#DIV/0!	#DIV/0!	#DIV/0!	Core
	0	0	0	0	0	0	0	0	0	0	0	0	0	0	0	0	0	#DIV/0!	#DIV/0!	#DIV/0!	Core
	0	0	0	0	0	0	0	0	0	0	0	0	0	0	0	0	0	#DIV/0!	#DIV/0!	#DIV/0!	Core
	0	0	0	0	0	0	0	0	0	0	0	0	0	0	0	0	0	#DIV/0!	#DIV/0!	#DIV/0!	Core
	0	0	0	0	0	0	0	0	0	0	0	0	0	0	0	0	0	#DIV/0!	#DIV/0!	#DIV/0!	Core
	0	0	0	0	0	0	0	0	0	0	0	0	0	0	0	0	0	#DIV/0!	#DIV/0!	#DIV/0!	Core
	0	0	0	0	0	0	0	0	0	0	0	0	0	0	0	0	0	#DIV/0!	#DIV/0!	#DIV/0!	Core
	0	0	0	0	0	0	0	0	0	0	0	0	0	0	0	0	0	#DIV/0!	#DIV/0!	#DIV/0!	Core
	0	0	0	0	0	0	0	0	0	0	0	0	0	0	0	0	0	#DIV/0!	#DIV/0!	#DIV/0!	Core
	0	0	0	0	0	0	0	0	0	0	0	0	0	0	0	0	0	#DIV/0!	#DIV/0!	#DIV/0!	Core
	0	0	0	0	0	0	0	0	0	0	0	0	0	0	0	0	0	#DIV/0!	#DIV/0!	#DIV/0!	Core
	0	0	0	0	0	0	0	0	0	0	0	0	0	0	0	0	0	#DIV/0!	#DIV/0!	#DIV/0!	Core
	0	0	0	0	0	0	0	0	0	0	0	0	0	0	0	0	0	#DIV/0!	#DIV/0!	#DIV/0!	Core
	0	0	0	0	0	0	0	0	0	0	0	0	0	0	0	0	0	#DIV/0!	#DIV/0!	#DIV/0!	Core
	0	0	0	0	0	0	0	0	0	0	0	0	0	0	0	0	0	#DIV/0!	#DIV/0!	#DIV/0!	Core
	0	0	0	0	0	0	0	0	0	0	0	0	0	0	0	0	0	#DIV/0!	#DIV/0!	#DIV/0!	Core
	0	0	0	0	0	0	0	0	0	0	0	0	0	0	0	0	0	#DIV/0!	#DIV/0!	#DIV/0!	Core
	0	0	0	0	0	0	0	0	0	0	0	0	0	0	0	0	0	#DIV/0!	#DIV/0!	#DIV/0!	Core
	0	0	0	0	0	0	0	0	0	0	0	0	0	0	0	0	0	#DIV/0!	#DIV/0!	#DIV/0!	Core
	0	0	0	0	0	0	0	0	0	0	0	0	0	0	0	0	0	#DIV/0!	#DIV/0!	#DIV/0!	Core
	0	0	0	0	0	0	0	0	0	0	0	0	0	0	0	0	0	#DIV/0!	#DIV/0!	#DIV/0!	Core
	0	0	0	0	0	0	0	0	0	0	0	0	0	0	0	0	0	#DIV/0!	#DIV/0!	#DIV/0!	Core
	0	0	0	0	0	0	0	0	0	0	0	0	0	0	0	0	0	#DIV/0!	#DIV/0!	#DIV/0!	Core
	0	0	0	0	0	0	0	0	0	0	0	0	0	0	0	0	0	#DIV/0!	#DIV/0!	#DIV/0!	Core
	0	0	0	0	0	0	0	0	0	0	0	0	0	0	0	0	0	#DIV/0!	#DIV/0!	#DIV/0!	Core
	0	0	0	0	0	0	0	0	0	0	0	0	0	0	0	0	0	#DIV/0!	#DIV/0!	#DIV/0!	Core
	0	0	0	0	0	0	0	0	0	0	0	0	0	0	0	0	0	#DIV/0!	#DIV/0!	#DIV/0!	Core
	0	0	0	0	0	0	0	0	0	0	0	0	0	0	0	0	0	#DIV/0!	#DIV/0!	#DIV/0!	Core
	0	0	0	0	0	0	0	0	0	0	0	0	0	0	0	0	0	#DIV/0!	#DIV/0!	#DIV/0!	Core
	0	0	0	0	0	0	0	0	0	0	0	0	0	0	0	0	0	#DIV/0!	#DIV/0!	#DIV/0!	Core
	0	0	0	0	0	0	0	0	0	0	0	0	0	0	0	0	0	#DIV/0!	#DIV/0!	#DIV/0!	Core
	0	0	0	0	0	0	0	0	0	0	0	0	0	0	0	0	0	#DIV/0!	#DIV/0!	#DIV/0!	Core
	0	0	0	0	0	0	0	0	0	0	0	0	0	0	0	0	0	#DIV/0!	#DIV/0!	#DIV/0!	Core
	0	0	0	0	0	0	0	0	0	0	0	0	0	0	0	0	0	#DIV/0!	#DIV/0!	#DIV/0!	Core
	0	0	0	0	0	0	0	0	0	0	0	0	0	0	0	0	0	#DIV/0!	#DIV/0!	#DIV/0!	Core
	0	0	0	0	0	0	0	0	0	0	0	0	0	0	0	0	0	#DIV/0!	#DIV/0!	#DIV/0!	Core
	0	0	0	0	0	0	0	0	0	0	0	0	0	0	0	0	0	#DIV/0!	#DIV/0!	#DIV/0!	Core
	0	0	0	0	0	0	0	0	0	0	0	0	0	0	0	0	0	#DIV/0!	#DIV/0!	#DIV/0!	Core
	0	0	0	0	0	0	0	0	0	0	0	0	0	0	0	0	0	#DIV/0!	#DIV/0!	#DIV/0!	Core
	0	0	0	0	0	0	0	0	0	0	0	0	0	0	0	0	0	#DIV/0!	#DIV/0!	#DIV/0!	Core
	0	0	0	0	0	0	0	0	0	0	0	0	0	0	0	0	0	#DIV/0!	#DIV/0!	#DIV/0!	Core
	0	0	0	0	0	0	0	0	0	0	0	0	0	0	0	0	0	#DIV/0!	#DIV/0!	#DIV/0!	Core
	0	0	0	0	0	0	0	0	0	0	0	0	0	0	0	0	0	#DIV/0!	#DIV/0!	#DIV/0!	Core
	0	0	0	0	0	0	0	0	0	0	0	0	0	0	0	0	0	#DIV/0!	#DIV/0!	#DIV/0!	Core
	0	0	0	0	0	0	0	0	0	0	0	0	0	0	0	0	0	#DIV/0!	#DIV/0!	#DIV/0!	Core
	0	0	0	0	0	0	0	0	0	0	0	0	0	0	0	0	0	#DIV/0!	#DIV/0!	#DIV/0!	Core
	0	0	0	0	0	0	0	0	0	0	0	0	0	0	0	0	0	#DIV/0!	#DIV/0!	#DIV/0!	Core
	0	0	0	0	0	0	0	0	0	0	0	0	0	0	0	0	0	#DIV/0!	#DIV/0!	#DIV/0!	Core
	0	0	0	0	0	0	0	0	0	0	0	0	0	0	0	0	0	#DIV/0!	#DIV/0!	#DIV/0!	Core
	0	0	0	0	0	0	0	0	0	0	0	0	0	0	0	0	0	#DIV/0!	#DIV/0!	#DIV/0!	Core
	0	0	0	0	0	0	0	0	0	0	0	0	0	0	0	0	0	#DIV/0!	#DIV/0!	#DIV/0!	Core
	0	0	0	0	0	0	0	0	0	0	0	0	0	0	0	0	0	#DIV/0!	#DIV/0!	#DIV/0!	Core
	0	0	0	0	0	0	0	0	0	0	0	0	0	0	0	0	0	#DIV/0!	#DIV/0!	#DIV/0!	Core
	0	0	0	0	0	0	0	0	0	0	0	0	0	0	0	0	0	#DIV/0!	#DIV/0!	#DIV/0!	Core
	0	0	0	0	0	0	0	0	0	0	0	0	0	0	0	0	0	#DIV/0!	#DIV/0!	#DIV/0!	Core
	0	0	0	0	0	0	0	0	0	0	0	0	0	0	0	0	0	#DIV/0!	#DIV/0!	#DIV/0!	Core
	0	0	0	0	0	0	0	0	0	0	0	0	0	0	0	0	0	#DIV/0!	#DIV/0!	#DIV/0!	Core
	0	0	0	0	0	0	0	0	0	0	0	0	0	0	0	0	0	#DIV/0!	#DIV/0!	#DIV/0!	Core
	0	0	0	0	0	0	0	0	0	0	0	0	0	0	0	0	0	#DIV/0!	#DIV/0!	#DIV/0!	Core
	0	0	0	0	0	0	0	0	0	0	0	0	0	0	0	0	0	#DIV/0!	#DIV/0!	#DIV/0!	Core
	0	0	0	0	0	0	0	0	0	0	0	0	0	0	0	0	0	#DIV/0!	#DIV/0!	#DIV/0!	Core
	0	0	0	0	0	0	0	0	0	0	0	0	0	0	0	0	0	#DIV/0!	#DIV/0!	#DIV/0!	Core
	0	0	0	0	0	0	0	0	0	0	0	0	0	0	0	0	0	#DIV/0!	#DIV/0!	#DIV/0!	Core
	0	0	0	0	0	0	0	0	0	0	0	0	0	0	0	0	0	#DIV/0!	#DIV/0!	#DIV/0!	Core
	0	0	0	0	0	0	0	0	0	0	0	0	0	0	0	0	0	#DIV/0!	#DIV/0!	#DIV/0!	Core
	0	0	0	0	0	0	0	0	0	0	0	0	0	0	0	0	0	#DIV/0!	#DIV/0!	#DIV/0!	Core
	0	0	0	0	0	0	0	0	0	0	0	0	0	0	0	0	0	#DIV/0!	#DIV/0!	#DIV/0!	Core
	0	0	0	0	0	0	0	0	0	0	0	0	0	0	0	0	0	#DIV/0!	#DIV/0!	#DIV/0!	Core
	0	0	0	0	0	0	0	0	0	0	0	0	0	0	0	0	0	#DIV/0!	#DIV/0!	#DIV/0!	Core
	0	0	0	0	0	0	0	0	0	0	0	0	0	0	0	0	0	#DIV/0!	#DIV/0!	#DIV/0!	Core
	0	0	0	0	0	0	0	0	0	0	0	0	0	0	0	0	0	#DIV/0!	#DIV/0!	#DIV/0!	Core
	0	0	0	0	0	0	0	0	0	0	0	0	0	0	0	0	0	#DIV/0!	#DIV/0!	#DIV/0!	Core
	0	0	0	0	0	0	0	0	0	0	0	0	0	0	0	0	0	#DIV/0!	#DIV/0!	#DIV/0!	Core
	0	0	0	0	0	0	0	0	0	0	0	0	0	0	0	0	0	#DIV/0!	#DIV/0!	#DIV/0!	Core
	0	0	0	0	0	0	0	0	0	0	0	0	0	0	0	0	0	#DIV/0!	#DIV/0!	#DIV/0!	Core
	0	0	0	0	0	0	0	0	0	0	0	0	0	0	0	0	0	#DIV/0!	#DIV/0!	#DIV/0!	Core
	0	0	0	0	0	0	0	0	0	0	0	0	0	0	0	0	0	#DIV/0!	#DIV/0!	#DIV/0!	Core
	0	0	0	0	0	0	0	0	0	0	0	0	0	0	0	0	0	#DIV/0!	#DIV/0!	#DIV/0!	Core
	0	0	0	0	0	0	0	0	0	0	0	0	0	0	0	0	0	#DIV/0!	#DIV/0!	#DIV/0!	Core
	0	0	0	0	0	0	0	0	0	0	0	0	0	0	0	0	0	#DIV/0!	#DIV/0!	#DIV/0!	Core
	0	0	0	0	0	0	0	0	0	0	0	0	0	0	0	0	0	#DIV/0!	#DIV/0!	#DIV/0!	Core
	0	0	0	0	0	0	0	0	0	0	0	0	0	0	0	0	0	#DIV/0!	#DIV/0!	#DIV/0!	Core
	0	0	0	0	0	0	0	0	0	0	0	0	0	0	0	0	0	#DIV/0!	#DIV/0!	#DIV/0!	Core
	0	0	0	0	0	0	0	0	0	0	0	0	0	0	0	0	0	#DIV/0!	#DIV/0!	#DIV/0!	Core
	0	0	0	0	0	0	0	0	0	0	0	0	0	0	0	0	0	#DIV/0!	#DIV/0!	#DIV/0!	Core
	0	0	0	0	0	0	0	0	0	0	0	0	0	0	0	0	0	#DIV/0!	#DIV/0!	#DIV/0!	Core
	0	0	0	0	0	0	0	0	0	0	0	0	0	0	0	0	0	#DIV/0!	#DIV/0!	#DIV/0!	Core
	0	0	0	0	0	0	0	0	0	0	0	0	0	0	0	0	0	0	0	0	Core
	0	0	0	0	0	0	0	0	0	0	0	0	0	0	0	0	0	0	0	0	Core

## Sheet: Similarity-Likeness Results
	Similarity
	Label	n	191-N46	188-S142	201-SM482	201-SM458
	191-N46	40	0.999442	0.91976	0.787582	0.715553
	188-S142	66	0.91976	0.999442	0.719897	0.660082
	201-SM482	49	0.787582	0.719897	0.999442	0.953888
	201-SM458	84	0.715553	0.660082	0.953888	0.999442
	Likeness
	Label	n	191-N46	188-S142	201-SM482	201-SM458
	191-N46	40	1	0.815997	0.47211	0.404647
	188-S142	66	0.815997	1	0.39395	0.346136
	201-SM482	49	0.47211	0.39395	1	0.883694
	201-SM458	84	0.404647	0.346136	0.883694	1
	Program used: DetritalPy
	Citation: Sharman, G.R., Sharman, J.P. and Sylvester, Z. 2018. detritalPy: A Python-based toolset for visualizing and analysing detrital geo-thermochronologic data. The Depositional Record, 4(2), 202-215.

## Sheet: DetritalPy Input
	DetritalPy Input File
	Sample_ID	Grain_ID	Analysis_ID	206Pb_204Pb	U_ppm	U_Th	Th_U	207Pb_206Pb	207Pb_206Pb_prop err	207Pb_235U	207Pb_235U_prop err	206Pb_238U	206Pb_238U_prop err	RHO	75Age	75Age_prop err	68Age	68Age_prop err	76Age	76Age_prop err	BestAge	BestAge_err	Disc	ZHe_Age	ZHe_Age_err	RimCore
	188-S142	188-S142_1	188-S142_1		159.4	1.047	0.95511	0.0557	0.0026	0.1689	0.0082	0.02214	0.00044	0.30627	158.4	7.3	141.1	2.8	375	95	141.1	2.8	10.9217
	188-S142	188-S142_2	188-S142_2		215	1.004	0.996016	0.0498	0.0024	0.1513	0.0069	0.02179	0.00036	0.010673	142.4	6.1	138.9	2.3	172	91	138.9	2.3	2.45787
	188-S142	188-S142_3	188-S142_3		609	0.498	2.00803	0.053	0.0015	0.1343	0.0041	0.01886	0.00032	0.3355	127.8	3.6	120.5	2	319	63	120.5	2	5.71205
	188-S142	188-S142_4	188-S142_4		448	0.804	1.24378	0.0534	0.002	0.1576	0.006	0.02127	0.00036	0.46527	148.1	5.2	135.7	2.3	323	76	135.7	2.3	8.37272
	188-S142	188-S142_5	188-S142_5		172.1	1.076	0.929368	0.0502	0.0021	0.1524	0.0063	0.02187	0.00035	0.15391	143.4	5.6	139.4	2.2	184	82	139.4	2.2	2.7894
	188-S142	188-S142_6	188-S142_6		186.9	1.179	0.848176	0.049	0.0022	0.1509	0.0065	0.02228	0.00037	0.031971	142.1	5.7	142	2.3	147	86	142	2.3	0.070373
	188-S142	188-S142_7	188-S142_7		174.3	1.336	0.748503	0.0995	0.0044	0.299	0.01	0.02188	0.00051	0.21824	264.3	7.9	139.5	3.2	1561	84	139.5	3.2	47.2191
	188-S142	188-S142_8	188-S142_8		453	0.625	1.6	0.0542	0.0019	0.171	0.0069	0.02229	0.0003	0.31814	159.6	5.9	142.1	1.9	366	76	142.1	1.9	10.9649
	188-S142	188-S142_9	188-S142_9		319	0.8	1.25	0.0578	0.0024	0.1991	0.0083	0.02453	0.00036	0.059687	183.6	7	156.2	2.3	479	87	156.2	2.3	14.9237
	188-S142	188-S142_10	188-S142_10		294	0.915	1.0929	0.0499	0.0017	0.1548	0.0051	0.02226	0.00033	0.033749	145.7	4.5	141.9	2.1	185	69	141.9	2.1	2.6081
	188-S142	188-S142_11	188-S142_11		139.3	0.804	1.24378	0.0491	0.0026	0.1508	0.0075	0.02232	0.00042	0.014571	141.8	6.6	142.3	2.6	123	97	142.3	2.6	0.352609
	188-S142	188-S142_12	188-S142_12		186	0.944	1.05932	0.0511	0.0023	0.1568	0.007	0.02211	0.00037	0.14051	147.2	6.1	140.9	2.4	214	89	140.9	2.4	4.27989
	188-S142	188-S142_13	188-S142_13		587	0.847	1.18064	0.0511	0.0013	0.1561	0.0036	0.02199	0.00032	0.1578	147.5	3.3	140.2	2	236	53	140.2	2	4.94915
	188-S142	188-S142_14	188-S142_14		193.5	0.986	1.0142	0.0505	0.0023	0.1603	0.0067	0.02291	0.00038	0.021085	150.4	5.9	146	2.4	216	92	146	2.4	2.92553
	188-S142	188-S142_15	188-S142_15		256	0.994	1.00604	0.0529	0.0023	0.168	0.0071	0.02296	0.0004	0.1218	157.1	6.1	146.3	2.5	283	87	146.3	2.5	6.8746
	188-S142	188-S142_16	188-S142_16		337.8	0.647	1.5456	0.05	0.0014	0.1768	0.0051	0.02541	0.00033	0.15476	165	4.4	161.7	2.1	192	59	161.7	2.1	2
	188-S142	188-S142_17	188-S142_17		170	1.058	0.94518	0.0587	0.0032	0.1814	0.0095	0.0225	0.00041	0.089505	169.3	8.3	143.4	2.6	490	110	143.4	2.6	15.2983
	188-S142	188-S142_18	188-S142_18		363	0.895	1.11732	0.0532	0.0018	0.1639	0.0052	0.02214	0.00032	0.059643	153.7	4.5	141.1	2	316	69	141.1	2	8.19779
	188-S142	188-S142_19	188-S142_19		190.5	1.207	0.8285	0.0509	0.0032	0.1585	0.0089	0.02285	0.0005	0.0097408	148.8	7.8	145.6	3.1	210	120	145.6	3.1	2.15054
	188-S142	188-S142_20	188-S142_20		410	0.821	1.21803	0.0522	0.0025	0.158	0.0071	0.0219	0.00043	0.053267	148.7	6.2	139.6	2.7	270	99	139.6	2.7	6.1197
	188-S142	188-S142_21	188-S142_21		100.6	1.065	0.938967	0.0501	0.003	0.1448	0.0083	0.02122	0.00047	0.024266	136.3	7.2	135.3	3	170	110	135.3	3	0.733676
	188-S142	188-S142_22	188-S142_22		466	0.807	1.23916	0.0565	0.0021	0.1719	0.006	0.02228	0.00036	0.20258	160.7	5.1	142	2.2	427	77	142	2.2	11.6366
	188-S142	188-S142_23	188-S142_23		266	0.98	1.02041	0.0508	0.0021	0.156	0.0062	0.02232	0.00036	0.027626	146.6	5.4	142.3	2.2	214	82	142.3	2.2	2.93315
	188-S142	188-S142_24	188-S142_24		555	0.645	1.55039	0.0495	0.0013	0.1614	0.0041	0.02355	0.00031	0.13654	151.7	3.6	150.1	1.9	166	53	150.1	1.9	1.05471
	188-S142	188-S142_25	188-S142_25		303	1.176	0.85034	0.0494	0.002	0.1499	0.0056	0.02204	0.00038	0.075862	141.4	5	140.5	2.4	154	77	140.5	2.4	0.636492
	188-S142	188-S142_26	188-S142_26		129	1.408	0.710227	0.0525	0.003	0.1583	0.0087	0.02197	0.00045	0.12937	149.3	7.9	140.1	2.9	260	110	140.1	2.9	6.16209
	188-S142	188-S142_27	188-S142_27		194	0.985	1.01523	0.0523	0.0025	0.1609	0.007	0.02241	0.00039	0.093359	150.9	6.1	142.9	2.4	284	96	142.9	2.4	5.30152
	188-S142	188-S142_28	188-S142_28		220.8	0.759	1.31752	0.049	0.002	0.1496	0.006	0.02206	0.00034	0.024567	141.1	5.3	140.6	2.2	145	81	140.6	2.2	0.354359
	188-S142	188-S142_29	188-S142_29		388	0.809	1.23609	0.0519	0.0017	0.1582	0.0053	0.02207	0.00036	0.27768	148.7	4.6	140.7	2.2	265	67	140.7	2.2	5.37996
	188-S142	188-S142_30	188-S142_30		174.1	0.993	1.00705	0.0508	0.0025	0.1496	0.007	0.02141	0.00038	0.012114	140.9	6.1	136.6	2.4	212	98	136.6	2.4	3.05181
	188-S142	188-S142_1	188-S142_1		998	0.59	1.69492	0.05304	0.0016	0.1587	0.0047	0.02193	0.00039	0.14853	149.5	4.1	139.84	2.5	320	67	139.84	2.5	6.46154
	188-S142	188-S142_2	188-S142_2		373	0.834	1.19904	0.0504	0.002	0.1523	0.0057	0.02221	0.00045	0.24568	143.7	5	141.6	2.8	207	81	141.6	2.8	1.46138
	188-S142	188-S142_3	188-S142_3		166.3	1.01	0.990099	0.052	0.0024	0.1563	0.0071	0.02217	0.00046	0.034821	147	6.2	141.3	2.9	261	95	141.3	2.9	3.87755
	188-S142	188-S142_4	188-S142_4		334	0.931	1.07411	0.048	0.002	0.1518	0.0059	0.02337	0.00048	0.1648	143.3	5.2	148.9	3	99	82	148.9	3	3.90789
	188-S142	188-S142_5	188-S142_5		132.4	1.006	0.994036	0.055	0.0027	0.1619	0.0079	0.02178	0.0005	0.29083	151.9	6.9	138.9	3.2	370	100	138.9	3.2	8.55826
	188-S142	188-S142_6	188-S142_6		131.1	1.189	0.841043	0.0516	0.0024	0.1612	0.0074	0.02308	0.00053	0.092745	151.2	6.5	147.1	3.4	241	94	147.1	3.4	2.71164
	188-S142	188-S142_7	188-S142_7		199	1.041	0.960615	0.0509	0.0021	0.1541	0.0065	0.02211	0.00046	0.14142	145.1	5.7	141	2.9	214	84	141	2.9	2.82564
	188-S142	188-S142_8	188-S142_8		386	0.699	1.43062	0.0507	0.0019	0.1514	0.0059	0.02177	0.00048	0.056139	142.9	5.2	138.8	3	233	84	138.8	3	2.86914
	188-S142	188-S142_10	188-S142_10		97.3	1.55	0.645161	0.0513	0.0031	0.1568	0.0095	0.02234	0.00053	0.12895	147.1	8.3	142.4	3.4	230	120	142.4	3.4	3.19511
	188-S142	188-S142_11	188-S142_11		529.9	0.4533	2.20604	0.055	0.0022	0.1617	0.0063	0.0216	0.00045	0.19256	152.1	5.5	137.7	2.9	395	86	137.7	2.9	9.46746
	188-S142	188-S142_12	188-S142_12		105	1.367	0.731529	0.0479	0.0033	0.1539	0.01	0.02371	0.00073	0.006442	144.5	8.9	151.1	4.6	100	130	151.1	4.6	4.56747
	188-S142	188-S142_13	188-S142_13		214	0.85	1.17647	0.0507	0.0022	0.1519	0.0068	0.02193	0.00047	0.08859	143.2	5.9	139.9	2.9	204	88	139.9	2.9	2.30447
	188-S142	188-S142_14	188-S142_14		73.3	1.43	0.699301	0.0507	0.0038	0.158	0.012	0.02295	0.00072	0.0013691	148.3	10	146.2	4.5	210	150	146.2	4.5	1.41605
	188-S142	188-S142_15	188-S142_15		669	0.825	1.21212	0.0487	0.0019	0.1453	0.0051	0.02187	0.00055	0.14654	137.6	4.5	139.5	3.5	135	81	139.5	3.5	1.38081
	188-S142	188-S142_16	188-S142_16		140	0.884	1.13122	0.0476	0.0024	0.1462	0.0072	0.02247	0.00053	0.040554	139	6.2	143.2	3.3	95	97	143.2	3.3	3.02158
	188-S142	188-S142_17	188-S142_17		814	0.549	1.82149	0.0547	0.002	0.1559	0.0054	0.02087	0.00041	0.16969	147	4.7	133.2	2.6	392	85	133.2	2.6	9.38776
	188-S142	188-S142_18	188-S142_18		133	1.077	0.928505	0.0512	0.0031	0.146	0.0089	0.021	0.00053	0.16085	137.9	7.9	134	3.4	220	120	134	3.4	2.82814
	188-S142	188-S142_19	188-S142_19		211.1	1.129	0.88574	0.0494	0.0022	0.1439	0.0063	0.02148	0.00048	0.026806	136.2	5.5	137	3	156	89	137	3	0.587372
	188-S142	188-S142_20	188-S142_20		144.6	0.8302	1.20453	0.0512	0.0023	0.1575	0.0067	0.02285	0.00051	0.022024	148.7	6	145.6	3.2	218	89	145.6	3.2	2.08473
	188-S142	188-S142_21	188-S142_21		617	0.6684	1.49611	0.0511	0.0017	0.15	0.005	0.02159	0.00041	0.18729	141.7	4.4	137.7	2.6	235	72	137.7	2.6	2.82287
	188-S142	188-S142_22	188-S142_22		994	0.6718	1.48854	0.04874	0.0015	0.1467	0.0045	0.02213	0.00043	0.28697	139	4	141.1	2.7	135	65	141.1	2.7	1.51079
	188-S142	188-S142_23	188-S142_23		105.7	1.41	0.70922	0.0499	0.0029	0.1545	0.0084	0.02283	0.00064	0.091316	146.4	7.7	145.5	4.1	190	110	145.5	4.1	0.614754
	188-S142	188-S142_25	188-S142_25		107.5	1.25	0.8	0.0513	0.0026	0.162	0.0083	0.02304	0.00053	0.25081	151.8	7.2	146.8	3.3	231	100	146.8	3.3	3.29381
	188-S142	188-S142_26	188-S142_26		260	0.682	1.46628	0.0644	0.004	0.195	0.011	0.02207	0.00066	0.18881	180.7	9.7	140.7	4.2	720	130	140.7	4.2	22.1361
	188-S142	188-S142_27	188-S142_27		106.9	1.332	0.750751	0.0519	0.0025	0.1588	0.0074	0.02222	0.0005	0.22856	149.1	6.5	141.6	3.2	259	96	141.6	3.2	5.03018
	188-S142	188-S142_28	188-S142_28		608	0.933	1.07181	0.0501	0.002	0.1443	0.0058	0.02093	0.00047	0.43168	136.7	5.2	133.5	3	197	86	133.5	3	2.34089
	188-S142	188-S142_29	188-S142_29		198.8	1.07	0.934579	0.0556	0.0025	0.1641	0.0073	0.02154	0.00051	0.23361	153.9	6.3	137.4	3.2	396	93	137.4	3.2	10.7212
	188-S142	188-S142_30	188-S142_30		127.2	0.965	1.03627	0.0504	0.0025	0.1501	0.0073	0.02161	0.0005	0.036198	141.6	6.4	137.8	3.1	203	99	137.8	3.1	2.68362
	188-S142	188-S142_31	188-S142_31		150	1.051	0.951475	0.0675	0.0034	0.2185	0.01	0.02358	0.00058	0.056558	200.1	8.4	150.2	3.6	805	110	150.2	3.6	24.9375
	188-S142	188-S142_32	188-S142_32		47.8	1.038	0.963391	0.0485	0.0051	0.142	0.014	0.02152	0.00079	0.028046	133	13	137.2	5	90	190	137.2	5	3.15789
	188-S142	188-S142_33	188-S142_33		149.2	1.094	0.914077	0.0533	0.0029	0.1637	0.0086	0.02221	0.00051	0.042032	153.5	7.4	141.6	3.2	320	110	141.6	3.2	7.75244
	188-S142	188-S142_34	188-S142_34		134.4	0.901	1.10988	0.0595	0.003	0.1716	0.0087	0.02092	0.00046	0.076561	160.2	7.5	133.5	2.9	526	110	133.5	2.9	16.6667
	188-S142	188-S142_35	188-S142_35		193	0.969	1.03199	0.0643	0.0035	0.1898	0.011	0.02154	0.00047	0.30359	175.6	9	137.4	3	670	110	137.4	3	21.754
	188-S142	188-S142_36	188-S142_36		233	0.794	1.25945	0.0548	0.0026	0.1521	0.0074	0.0202	0.00045	0.24097	143.4	6.5	128.9	2.9	365	100	128.9	2.9	10.1116
	188-S142	188-S142_37	188-S142_37		157	1.006	0.994036	0.0527	0.004	0.156	0.011	0.02175	0.00051	0.00080291	146.9	9.9	138.7	3.2	270	150	138.7	3.2	5.58203
	188-S142	188-S142_38	188-S142_38		490	0.712	1.40449	0.0519	0.0017	0.1499	0.005	0.02098	0.00039	0.27819	141.6	4.4	133.8	2.4	267	70	133.8	2.4	5.50847
	191-N46	191-N46_1	191-N46_1		224	1.129	0.88574	0.051	0.0026	0.1624	0.0083	0.02313	0.00051	0.10557	152.5	7.2	147.4	3.2	225	110	147.4	3.2	3.34426
	191-N46	191-N46_2	191-N46_2		259	2.71	0.369004	0.0534	0.002	0.2782	0.01	0.03781	0.00074	0.11472	248.8	8.1	239.2	4.6	328	82	239.2	4.6	3.85852
	191-N46	191-N46_3	191-N46_3		645	0.8025	1.24611	0.05	0.0026	0.1469	0.0076	0.0213	0.00043	0.080508	139	6.7	135.9	2.7	188	110	135.9	2.7	2.23022
	191-N46	191-N46_4	191-N46_4		118.2	1.071	0.933707	0.0485	0.0024	0.1513	0.0071	0.02289	0.00053	0.014235	142.6	6.3	145.9	3.4	120	96	145.9	3.4	2.31417
	191-N46	191-N46_5	191-N46_5		152.7	0.963	1.03842	0.0494	0.0021	0.1585	0.0069	0.0232	0.00049	0.19267	149	6	147.8	3.1	167	88	147.8	3.1	0.805369
	191-N46	191-N46_6	191-N46_6		81.4	0.946	1.05708	0.0471	0.0026	0.1468	0.008	0.02254	0.00054	0.076798	138.4	7.1	143.7	3.4	80	110	143.7	3.4	3.82948
	191-N46	191-N46_7	191-N46_7		95.7	1.416	0.706215	0.0511	0.0027	0.151	0.0079	0.02152	0.0005	0.075243	142.3	7	137.3	3.2	236	110	137.3	3.2	3.5137
	191-N46	191-N46_8	191-N46_8		111.7	1.328	0.753012	0.0496	0.0023	0.1525	0.007	0.02236	0.00052	0.17374	143.6	6.2	142.5	3.3	159	91	142.5	3.3	0.766017
	191-N46	191-N46_9	191-N46_9		153	0.901	1.10988	0.0485	0.0022	0.1526	0.0069	0.02289	0.00055	0.23465	144.4	5.9	145.9	3.5	130	88	145.9	3.5	1.03878
	191-N46	191-N46_10	191-N46_10		239.9	0.785	1.27389	0.0492	0.0022	0.1459	0.0065	0.02152	0.00044	0.10248	138	5.7	137.2	2.8	152	92	137.2	2.8	0.57971
	191-N46	191-N46_11	191-N46_11		82	1.164	0.859107	0.0564	0.0032	0.1683	0.0096	0.02175	0.00055	0.18579	156.8	8.3	138.7	3.5	380	110	138.7	3.5	11.5434
	191-N46	191-N46_13	191-N46_13		107.7	1.092	0.915751	0.0508	0.0026	0.1558	0.0075	0.02234	0.00052	0.011323	146.5	6.6	142.4	3.3	205	99	142.4	3.3	2.79863
	191-N46	191-N46_14	191-N46_14		174.6	0.871	1.14811	0.0535	0.003	0.1696	0.0096	0.02282	0.00053	0.092402	158.4	8.3	145.4	3.3	320	110	145.4	3.3	8.20707
	191-N46	191-N46_15	191-N46_15		225.3	1.525	0.655738	0.0537	0.0023	0.207	0.0087	0.0281	0.00068	0.15023	190.8	7.3	178.6	4.3	339	95	178.6	4.3	6.39413
	191-N46	191-N46_16	191-N46_16		268.5	0.808	1.23762	0.0579	0.0028	0.1677	0.0076	0.0211	0.00046	0.020948	158.1	6.9	134.6	2.9	486	100	134.6	2.9	14.864
	191-N46	191-N46_17	191-N46_17		176.9	1.065	0.938967	0.0758	0.0051	0.283	0.02	0.02686	0.00064	0.27558	253	16	170.8	4	1020	130	170.8	4	32.4901
	191-N46	191-N46_18	191-N46_18		154.3	1.047	0.95511	0.0603	0.003	0.1807	0.0089	0.02145	0.00045	0.042175	168.7	7.8	136.8	2.8	570	110	136.8	2.8	18.9093
	191-N46	191-N46_19	191-N46_19		115	1.058	0.94518	0.047	0.0028	0.1488	0.0085	0.02288	0.00066	0.099456	140.3	7.5	145.8	4.1	80	110	145.8	4.1	3.92017
	191-N46	191-N46_20	191-N46_20		114.3	1.139	0.877963	0.051	0.0029	0.1573	0.009	0.0221	0.00065	0.22696	147.9	7.8	140.9	4.1	230	120	140.9	4.1	4.73293
	191-N46	191-N46_21	191-N46_21		226.5	1.04	0.961538	0.0508	0.0024	0.1544	0.0072	0.02202	0.00052	0.24495	145.6	6.3	140.4	3.3	216	98	140.4	3.3	3.57143
	191-N46	191-N46_22	191-N46_22		357	5.59	0.178891	0.0509	0.0026	0.275	0.013	0.03865	0.0011	0.03528	246.2	11	244.4	6.9	250	120	244.4	6.9	0.731113
	191-N46	191-N46_23	191-N46_23		70.9	1.087	0.919963	0.0566	0.0033	0.192	0.011	0.02469	0.00067	0.21319	177.7	9.6	157.2	4.2	420	120	157.2	4.2	11.5363
	191-N46	191-N46_24	191-N46_24		203.1	0.884	1.13122	0.0493	0.0022	0.1539	0.0064	0.02268	0.0005	0.015112	145.1	5.6	144.6	3.2	155	87	144.6	3.2	0.34459
	191-N46	191-N46_25	191-N46_25		70.9	1.38	0.724638	0.0502	0.003	0.1603	0.0092	0.02322	0.00058	0.10453	150.1	8	147.9	3.7	170	110	147.9	3.7	1.46569
	191-N46	191-N46_26	191-N46_26		250.4	0.569	1.75747	0.0514	0.0021	0.152	0.0062	0.02152	0.00043	0.24335	143.3	5.4	137.2	2.7	235	83	137.2	2.7	4.2568
	191-N46	191-N46_27	191-N46_27		82.3	1.063	0.940734	0.0572	0.0045	0.164	0.013	0.0209	0.00058	0.014889	153	11	133.3	3.7	400	160	133.3	3.7	12.8758
	191-N46	191-N46_28	191-N46_28		901	4.27	0.234192	0.07625	0.002	0.812	0.022	0.07693	0.0016	0.59638	603.1	13	477.7	9.4	1098	55	477.7	9.4	20.7926
	191-N46	191-N46_29	191-N46_29		237	0.844	1.18483	0.0507	0.0022	0.1632	0.007	0.0235	0.0006	0.26914	153.2	6.1	149.7	3.7	211	91	149.7	3.7	2.2846
	191-N46	191-N46_30	191-N46_30		70.8	1.135	0.881057	0.0506	0.0029	0.1612	0.0096	0.02326	0.00063	0.28493	152.6	7.9	148.2	3.9	210	120	148.2	3.9	2.88336
	191-N46	191-N46_31	191-N46_31		263.1	3.77	0.265252	0.0531	0.0019	0.3165	0.011	0.04315	0.00096	0.22098	278.9	8.5	272.3	5.9	331	83	272.3	5.9	2.36644
	191-N46	191-N46_32	191-N46_32		184.3	1.298	0.770416	0.0501	0.0022	0.154	0.0064	0.02238	0.00049	0.12753	145.1	5.6	142.7	3.1	191	87	142.7	3.1	1.65403
	191-N46	191-N46_33	191-N46_33		174.3	0.884	1.13122	0.0494	0.0021	0.151	0.0062	0.02211	0.00048	0.1164	142.5	5.5	141	3	157	86	141	3	1.05263
	191-N46	191-N46_34	191-N46_34		738	5.34	0.187266	0.0494	0.002	0.1616	0.0062	0.02364	0.00054	0.16746	152	5.4	150.6	3.4	164	84	150.6	3.4	0.921053
	191-N46	191-N46_35	191-N46_35		153.7	1.046	0.956023	0.0549	0.0026	0.1662	0.0081	0.02181	0.00047	0.15815	155.5	7	139.1	3	372	100	139.1	3	10.5466
	191-N46	191-N46_36	191-N46_36		143.7	0.96	1.04167	0.0495	0.0024	0.1465	0.0069	0.02141	0.00049	0.13657	138.5	6.2	136.6	3.1	161	97	136.6	3.1	1.37184
	191-N46	191-N46_37	191-N46_37		112.9	0.914	1.09409	0.0466	0.0025	0.145	0.0079	0.02226	0.00053	0.071774	137	6.9	141.9	3.4	64	110	141.9	3.4	3.57664
	191-N46	191-N46_38	191-N46_38		870	3.449	0.289939	0.06115	0.0016	0.9164	0.024	0.1077	0.002	0.60103	660.1	13	659.1	12	642	55	659.1	12	0.151492
	191-N46	191-N46_39	191-N46_39		176.3	1.002	0.998004	0.0497	0.0024	0.1657	0.0081	0.02404	0.00063	0.30916	155.3	7	153.1	4	167	95	153.1	4	1.41661
	191-N46	191-N46_40	191-N46_40		182	1.013	0.987167	0.0467	0.0025	0.1486	0.008	0.02266	0.00062	0.13056	140.3	7.1	144.4	3.9	78	110	144.4	3.9	2.92231
	191-N46	191-N46_41	191-N46_41		227.4	0.851	1.17509	0.0502	0.0022	0.1555	0.0065	0.02244	0.00049	0.060497	146.5	5.7	143	3.1	190	89	143	3.1	2.38908
	201-SM458	201-SM458_1	201-SM458_1		214	0.508	1.9685	0.0562	0.0038	0.193	0.015	0.02481	0.00083	0.17081	178	12	157.9	5.2	420	140	157.9	5.2	11.2921
	201-SM458	201-SM458_2	201-SM458_2		501	0.76	1.31579	0.0592	0.002	0.1967	0.0069	0.02407	0.00048	0.22833	182	5.9	153.3	3	549	75	153.3	3	15.7692
	201-SM458	201-SM458_3	201-SM458_3		725	4.18	0.239234	0.055	0.0014	0.1705	0.0048	0.02254	0.00038	0.34487	159.7	4.1	143.7	2.4	394	55	143.7	2.4	10.0188
	201-SM458	201-SM458_4	201-SM458_4		93.5	0.758	1.31926	0.0504	0.0026	0.1743	0.0085	0.02541	0.00057	0.023106	162.3	7.4	161.7	3.6	200	100	161.7	3.6	0.369686
	201-SM458	201-SM458_7	201-SM458_7		196.1	0.5281	1.89358	0.0517	0.0029	0.1735	0.009	0.02449	0.00049	0.079934	162	7.7	156	3.1	240	110	156	3.1	3.7037
	201-SM458	201-SM458_8	201-SM458_8		726	0.6634	1.50739	0.052	0.0012	0.1792	0.0044	0.0251	0.00038	0.25228	167.2	3.7	159.8	2.4	273	49	159.8	2.4	4.42584
	201-SM458	201-SM458_9	201-SM458_9		336	0.706	1.41643	0.0499	0.0021	0.1725	0.0069	0.02557	0.0005	0.15837	162.3	6.3	162.8	3.1	175	84	162.8	3.1	0.308071
	201-SM458	201-SM458_11	201-SM458_11		309	0.931	1.07411	0.0537	0.0028	0.1929	0.01	0.02619	0.00046	0.10062	178.5	8.5	166.6	2.9	320	110	166.6	2.9	6.66667
	201-SM458	201-SM458_12	201-SM458_12		3150	0.4888	2.04583	0.0757	0.0027	0.285	0.011	0.02738	0.00038	0.25216	254.2	8.7	174.1	2.4	1053	73	174.1	2.4	31.5106
	201-SM458	201-SM458_13	201-SM458_13		315.9	0.76	1.31579	0.0522	0.0026	0.178	0.0085	0.02484	0.00051	0.024254	166	7.3	158.2	3.2	270	100	158.2	3.2	4.6988
	201-SM458	201-SM458_14	201-SM458_14		1040	2.79	0.358423	0.0488	0.0019	0.1762	0.0061	0.02597	0.0005	0.010566	164.5	5.3	165.3	3.2	146	78	165.3	3.2	0.486322
	201-SM458	201-SM458_15	201-SM458_15		121.7	0.742	1.34771	0.0495	0.0028	0.172	0.0093	0.02539	0.00061	0.068898	161.7	7.8	161.6	3.8	160	110	161.6	3.8	0.0618429
	201-SM458	201-SM458_16	201-SM458_16		596	0.536	1.86567	0.0541	0.0019	0.1932	0.0071	0.02602	0.00045	0.27582	180	6.3	165.6	2.8	344	74	165.6	2.8	8
	201-SM458	201-SM458_17	201-SM458_17		241	0.5702	1.75377	0.0511	0.0021	0.1771	0.0071	0.02522	0.00043	0.011936	165.1	6.1	160.6	2.7	219	83	160.6	2.7	2.72562
	201-SM458	201-SM458_18	201-SM458_18		2430	0.897	1.11483	0.0513	0.0025	0.1786	0.0086	0.02517	0.0008	0.23823	166.7	7.4	160.2	5	240	110	160.2	5	3.89922
	201-SM458	201-SM458_19	201-SM458_19		826	0.4214	2.37304	0.049	0.0012	0.1715	0.0047	0.02529	0.00039	0.38014	160.6	4.1	161	2.4	145	52	161	2.4	0.249066
	201-SM458	201-SM458_20	201-SM458_20		175.8	0.6202	1.61238	0.0585	0.0032	0.204	0.011	0.02553	0.00053	0.22163	187.6	9.2	162.5	3.3	490	110	162.5	3.3	13.3795
	201-SM458	201-SM458_23	201-SM458_23		563	0.563	1.7762	0.056	0.002	0.2012	0.0074	0.02607	0.00042	0.099051	185.8	6.2	165.9	2.6	418	78	165.9	2.6	10.7104
	201-SM458	201-SM458_24	201-SM458_24		660	0.708	1.41243	0.0546	0.0015	0.1996	0.0056	0.02638	0.00041	0.12899	184.6	4.7	167.8	2.6	382	61	167.8	2.6	9.10076
	201-SM458	201-SM458_25	201-SM458_25		92.5	0.765	1.30719	0.0487	0.0028	0.174	0.0099	0.02617	0.00063	0.086386	162.9	8.8	166.5	4	130	110	166.5	4	2.20994
	201-SM458	201-SM458_27	201-SM458_27		346.6	0.845	1.18343	0.047	0.0035	0.0519	0.0036	0.00819	0.0002	0.056669	51.3	3.5	52.6	1.3	40	130	52.6	1.3	2.53411
	201-SM458	201-SM458_28	201-SM458_28		99.9	0.656	1.52439	0.0508	0.0033	0.178	0.011	0.02561	0.00059	0.0061301	165.3	9.5	163.6	3.9	190	120	163.6	3.9	1.02843
	201-SM458	201-SM458_29	201-SM458_29		443	0.786	1.27226	0.0497	0.0014	0.1762	0.005	0.02585	0.0004	0.07564	164.6	4.3	164.5	2.5	173	56	164.5	2.5	0.0607533
	201-SM458	201-SM458_30	201-SM458_30		250	0.68	1.47059	0.0497	0.0017	0.1744	0.0061	0.02583	0.00045	0.18218	163.5	5.4	164.4	2.8	171	69	164.4	2.8	0.550459
	201-SM458	201-SM458_31	201-SM458_31		119	0.834	1.19904	0.0522	0.0032	0.18	0.01	0.02567	0.00051	0.059805	167.2	9	163.4	3.2	230	110	163.4	3.2	2.27273
	201-SM458	201-SM458_32	201-SM458_32		343	0.874	1.14416	0.0505	0.0017	0.1739	0.0059	0.02536	0.00042	0.16508	163.1	5.2	161.4	2.7	202	68	161.4	2.7	1.04231
	201-SM458	201-SM458_34	201-SM458_34		88.4	0.771	1.29702	0.051	0.0029	0.182	0.01	0.02606	0.00062	0.031231	169.1	8.9	165.8	3.9	220	110	165.8	3.9	1.95151
	201-SM458	201-SM458_36	201-SM458_36		133.1	0.665	1.50376	0.049	0.0024	0.1739	0.0084	0.02598	0.00054	0.014182	162.1	7.3	165.3	3.4	162	99	165.3	3.4	1.97409
	201-SM458	201-SM458_37	201-SM458_37		94.1	0.784	1.27551	0.0512	0.0032	0.18	0.011	0.02595	0.00066	0.12431	166.9	9.6	165.1	4.2	220	120	165.1	4.2	1.07849
	201-SM458	201-SM458_39	201-SM458_39		149	0.5768	1.7337	0.0494	0.0027	0.1735	0.0094	0.02559	0.00052	0.084179	161.8	8.1	162.9	3.2	150	100	162.9	3.2	0.679852
	201-SM458	201-SM458_41	201-SM458_41		590	0.6434	1.55424	0.0498	0.0012	0.1756	0.0042	0.02561	0.00037	0.1697	164.1	3.7	163	2.3	176	52	163	2.3	0.670323
	201-SM458	201-SM458_42	201-SM458_42		183.3	0.4847	2.06313	0.051	0.0022	0.1801	0.0081	0.02564	0.00045	0.13605	167.4	7	163.2	2.9	216	87	163.2	2.9	2.50896
	201-SM458	201-SM458_43	201-SM458_43		282.6	0.5499	1.81851	0.0509	0.0019	0.178	0.0067	0.02547	0.00043	0.13152	165.9	5.7	162.1	2.7	214	76	162.1	2.7	2.29054
	201-SM458	201-SM458_44	201-SM458_44		2021	0.4057	2.46488	0.04946	0.00078	0.1818	0.0036	0.02672	0.00036	0.40748	169.5	3.1	170	2.3	166	35	170	2.3	0.294985
	201-SM458	201-SM458_46	201-SM458_46		125.3	0.575	1.73913	0.0581	0.0031	0.21	0.012	0.0262	0.00068	0.27777	192.3	9.7	166.7	4.3	490	110	166.7	4.3	13.3125
	201-SM458	201-SM458_47	201-SM458_47		458	0.6703	1.49187	0.0515	0.0015	0.1799	0.0057	0.02544	0.00039	0.37649	168.5	5.1	162	2.4	248	62	162	2.4	3.85757
	201-SM458	201-SM458_49	201-SM458_49		301	0.891	1.12233	0.0504	0.0019	0.1767	0.0066	0.02551	0.00039	0.0030299	164.8	5.6	162.3	2.5	193	75	162.3	2.5	1.51699
	201-SM458	201-SM458_51	201-SM458_51		1359	0.5728	1.74581	0.04932	0.00091	0.1795	0.0038	0.02641	0.00036	0.24628	167.5	3.3	168.1	2.3	160	40	168.1	2.3	0.358209
	201-SM458	201-SM458_52	201-SM458_52		123.7	0.682	1.46628	0.0588	0.006	0.206	0.018	0.0257	0.00096	0.23846	189	15	163.6	6	470	210	163.6	6	13.4392
	201-SM458	201-SM458_54	201-SM458_54		250.5	0.785	1.27389	0.0607	0.0044	0.224	0.017	0.02691	0.00061	0.14971	204	14	171.1	3.8	560	150	171.1	3.8	16.1275
	201-SM458	201-SM458_56	201-SM458_56		169.8	0.583	1.71527	0.05	0.0026	0.184	0.011	0.02618	0.0006	0.058387	172.5	9.4	166.6	3.8	230	120	166.6	3.8	3.42029
	201-SM458	201-SM458_57	201-SM458_57		167.1	0.6058	1.65071	0.0495	0.0019	0.178	0.0066	0.02619	0.00049	0.0061726	165.9	5.7	166.7	3	172	76	166.7	3	0.482218
	201-SM458	201-SM458_58	201-SM458_58		205	1.44	0.694444	0.0504	0.0028	0.1832	0.0098	0.02668	0.00063	0.096781	170.2	8.4	169.7	4	200	110	169.7	4	0.293772
	201-SM458	201-SM458_60	201-SM458_60		802	0.4735	2.11193	0.0495	0.0011	0.1742	0.0044	0.02564	0.00039	0.32825	162.9	3.8	163.2	2.5	172	48	163.2	2.5	0.184162
	201-SM458	201-SM458_62	201-SM458_62		137.6	0.615	1.62602	0.0502	0.0026	0.1729	0.0087	0.02523	0.00046	0.081879	161.1	7.5	160.6	2.9	190	100	160.6	2.9	0.310366
	201-SM458	201-SM458_64	201-SM458_64		307.3	0.5413	1.8474	0.0501	0.0015	0.1774	0.0055	0.02574	0.00044	0.17506	165.5	4.7	163.8	2.8	197	62	163.8	2.8	1.02719
	201-SM458	201-SM458_65	201-SM458_65		288	0.561	1.78253	0.0516	0.002	0.1806	0.0071	0.02554	0.00045	0.13703	168.1	6.1	162.5	2.8	257	80	162.5	2.8	3.33135
	201-SM458	201-SM458_66	201-SM458_66		293	0.5037	1.98531	0.0499	0.0019	0.1763	0.0066	0.02572	0.00042	0.078075	164.4	5.7	163.7	2.6	179	74	163.7	2.6	0.425791
	201-SM458	201-SM458_67	201-SM458_67		165.9	0.531	1.88324	0.0505	0.0037	0.181	0.014	0.026	0.00085	0.24699	168	12	165.4	5.3	190	140	165.4	5.3	1.54762
	201-SM458	201-SM458_68	201-SM458_68		385.6	0.5213	1.91828	0.0502	0.0015	0.1788	0.0054	0.0259	0.00044	0.084359	166.7	4.6	164.8	2.8	188	63	164.8	2.8	1.13977
	201-SM458	201-SM458_70	201-SM458_70		168.4	0.729	1.37174	0.0628	0.004	0.227	0.014	0.02636	0.00075	0.11119	207	12	167.7	4.7	630	140	167.7	4.7	18.9855
	201-SM458	201-SM458_71	201-SM458_71		341	1.164	0.859107	0.0492	0.0015	0.1796	0.006	0.02626	0.00046	0.15109	167.4	5.1	167.1	2.9	157	65	167.1	2.9	0.179211
	201-SM458	201-SM458_72	201-SM458_72		1159	0.5457	1.83251	0.04967	0.00091	0.1753	0.0039	0.02555	0.00035	0.36366	163.9	3.3	162.6	2.2	174	39	162.6	2.2	0.793167
	201-SM458	201-SM458_74	201-SM458_74		520	0.4983	2.00682	0.0507	0.0013	0.1775	0.0049	0.02532	0.00039	0.2498	165.6	4.2	161.2	2.5	215	54	161.2	2.5	2.657
	201-SM458	201-SM458_76	201-SM458_76		120.3	0.648	1.54321	0.05	0.0028	0.1784	0.0097	0.02613	0.00054	0.051978	165.6	8.3	166.3	3.4	180	110	166.3	3.4	0.422705
	201-SM458	201-SM458_77	201-SM458_77		211.3	0.882	1.13379	0.0493	0.0019	0.1716	0.0067	0.02511	0.00046	0.0043239	160.3	5.8	159.9	2.9	161	78	159.9	2.9	0.249532
	201-SM458	201-SM458_78	201-SM458_78		148.2	0.5473	1.82715	0.0508	0.0026	0.1748	0.0089	0.02501	0.00051	0.067469	162.7	7.6	159.2	3.2	206	98	159.2	3.2	2.1512
	201-SM458	201-SM458_80	201-SM458_80		96.6	0.745	1.34228	0.0514	0.004	0.181	0.014	0.02581	0.00098	0.26235	168	12	164.2	6.2	220	150	164.2	6.2	2.2619
	201-SM458	201-SM458_82	201-SM458_82		209.4	0.585	1.7094	0.0484	0.0023	0.1684	0.0076	0.02535	0.00048	0.021096	157.5	6.6	161.4	3	115	91	161.4	3	2.47619
	201-SM458	201-SM458_83	201-SM458_83		538	0.85	1.17647	0.0592	0.0022	0.2049	0.0072	0.02523	0.00047	0.024101	188.8	6	160.6	2.9	526	77	160.6	2.9	14.9364
	201-SM458	201-SM458_84	201-SM458_84		691	0.4808	2.07987	0.0496	0.0013	0.1737	0.005	0.02547	0.00039	0.24	162.4	4.3	162.1	2.5	167	55	162.1	2.5	0.184729
	201-SM458	201-SM458_85	201-SM458_85		1254	0.431	2.32019	0.0529	0.0011	0.1874	0.0043	0.02579	0.00039	0.31667	174.2	3.7	164.1	2.4	322	48	164.1	2.4	5.79793
	201-SM458	201-SM458_5	201-SM458_5		101.9	1.493	0.669792	0.066	0.01	0.234	0.035	0.0257	0.0011	0.11976	208	28	163.3	7.1	610	300	163.3	7.1	21.4904
	201-SM458	201-SM458_10	201-SM458_10		502	3.64	0.274725	0.0572	0.0033	0.199	0.011	0.02524	0.00064	0.29798	183.3	9.4	160.6	4	460	120	160.6	4	12.3841
	201-SM458	201-SM458_21	201-SM458_21		1070	3.91	0.255754	0.05	0.0027	0.1815	0.0095	0.02635	0.00073	0.30423	169	8.1	167.6	4.6	190	110	167.6	4.6	0.828402
	201-SM458	201-SM458_22	201-SM458_22		2140	9.67	0.103413	0.0513	0.0026	0.1688	0.0072	0.02434	0.00094	0.40034	158.2	6.3	155	5.9	240	110	155	5.9	2.02276
	201-SM458	201-SM458_26	201-SM458_26		504	2.42	0.413223	0.0534	0.0031	0.184	0.011	0.02571	0.00098	0.52753	171.4	9.3	163.6	6.2	320	120	163.6	6.2	4.55076
	201-SM458	201-SM458_33	201-SM458_33		354	2.17	0.460829	0.0495	0.0037	0.166	0.011	0.0243	0.00067	0.056765	155.1	9.5	154.8	4.2	150	140	154.8	4.2	0.193424
	201-SM458	201-SM458_35	201-SM458_35		682	2.29	0.436681	0.055	0.0047	0.181	0.016	0.02448	0.00099	0.52013	168	14	155.9	6.2	370	180	155.9	6.2	7.20238
	201-SM458	201-SM458_38	201-SM458_38		596	2.7	0.37037	0.0774	0.0062	0.266	0.022	0.02485	0.00072	0.22314	238	17	158.2	4.5	1030	160	158.2	4.5	33.5294
	201-SM458	201-SM458_40	201-SM458_40		184.8	2.61	0.383142	0.0602	0.0054	0.202	0.018	0.02451	0.00099	0.19454	185	15	156.1	6.3	520	190	156.1	6.3	15.6216
	201-SM458	201-SM458_45	201-SM458_45		1281	1.01	0.990099	0.0505	0.0021	0.1385	0.0046	0.02152	0.0006	0.28354	131.6	4.1	137.2	3.8	210	86	137.2	3.8	4.25532
	201-SM458	201-SM458_48	201-SM458_48		343	11.7	0.0854701	0.0605	0.0053	0.209	0.018	0.0258	0.0013	0.32343	192	15	163.9	7.9	550	190	163.9	7.9	14.6354
	201-SM458	201-SM458_50	201-SM458_50		3400	18.57	0.0538503	0.0527	0.0016	0.1778	0.0049	0.02428	0.00047	0.53174	166	4.2	154.7	3	306	66	154.7	3	6.80723
	201-SM458	201-SM458_53	201-SM458_53		308	2.264	0.441696	0.0551	0.0038	0.208	0.014	0.02767	0.00089	0.23865	191	11	175.9	5.6	380	140	175.9	5.6	7.90576
	201-SM458	201-SM458_55	201-SM458_55		440	2.109	0.474158	0.0543	0.0036	0.194	0.013	0.02606	0.00069	0.24735	179	11	165.8	4.3	320	130	165.8	4.3	7.3743
	201-SM458	201-SM458_59	201-SM458_59		1245	2.32	0.431034	0.0679	0.0051	0.233	0.015	0.02553	0.00093	0.088148	212	13	162.5	5.8	810	160	162.5	5.8	23.3491
	201-SM458	201-SM458_61	201-SM458_61		2480	6.39	0.156495	0.0505	0.0024	0.1749	0.0072	0.02549	0.0008	0.1996	163.5	6.2	162.2	5	229	110	162.2	5	0.795107
	201-SM458	201-SM458_63	201-SM458_63		1050	8.7	0.114943	0.0582	0.0057	0.177	0.014	0.02287	0.00097	0.12453	165	12	145.7	6.1	470	180	145.7	6.1	11.697
	201-SM458	201-SM458_69	201-SM458_69		387	2.07	0.483092	0.0561	0.0034	0.192	0.011	0.02515	0.00075	0.26685	177.3	9.2	160.1	4.7	400	120	160.1	4.7	9.70107
	201-SM458	201-SM458_73	201-SM458_73		491	3.629	0.275558	0.0655	0.0033	0.222	0.01	0.02438	0.00064	0.1243	203.2	8.3	155.2	4	752	110	155.2	4	23.622
	201-SM458	201-SM458_75	201-SM458_75		317	2.39	0.41841	0.0737	0.0071	0.247	0.023	0.02482	0.00087	0.308	221	18	158	5.5	900	180	158	5.5	28.5068
	201-SM458	201-SM458_79	201-SM458_79		1420	12.8	0.078125	0.0509	0.0033	0.17	0.011	0.02468	0.00089	0.35431	159.2	9.5	157.2	5.6	250	150	157.2	5.6	1.25628
	201-SM458	201-SM458_81	201-SM458_81		523	3.32	0.301205	0.056	0.0027	0.1983	0.0087	0.02566	0.00084	0.12077	183.2	7.4	163.3	5.3	450	110	163.3	5.3	10.8624
	201-SM482	201-SM482_1	201-SM482_1		252.1	0.818	1.22249	0.0509	0.0018	0.1773	0.0061	0.02512	0.00042	0.045475	165.9	5.1	159.9	2.6	232	74	159.9	2.6	3.61664
	201-SM482	201-SM482_2	201-SM482_2		545.6	0.631	1.58479	0.0493	0.0023	0.1709	0.009	0.0252	0.0004	0.19505	161.2	7.5	160.4	2.5	170	86	160.4	2.5	0.496278
	201-SM482	201-SM482_3	201-SM482_3		603	0.6268	1.59541	0.0494	0.0014	0.1742	0.0049	0.02547	0.00038	0.1775	162.7	4.3	162.1	2.4	165	58	162.1	2.4	0.368777
	201-SM482	201-SM482_4	201-SM482_4		566	0.633	1.57978	0.0499	0.0016	0.1725	0.0052	0.02505	0.00036	0.030661	161.2	4.5	159.5	2.3	175	64	159.5	2.3	1.05459
	201-SM482	201-SM482_5	201-SM482_5		549	1.85	0.540541	0.0484	0.0018	0.1671	0.0064	0.02497	0.00043	0.094589	156.6	5.5	159	2.7	112	73	159	2.7	1.53257
	201-SM482	201-SM482_6	201-SM482_6		132.4	0.819	1.221	0.0504	0.0026	0.1769	0.0092	0.02549	0.00049	0.021236	164.4	8.1	162.3	3.1	180	100	162.3	3.1	1.27737
	201-SM482	201-SM482_7	201-SM482_7		1010	3.23	0.309598	0.0795	0.0021	1.74	0.13	0.1581	0.0073	0.069329	1020	38	946	39	1160	50	1160	50	18.4483
	201-SM482	201-SM482_8	201-SM482_8		212.4	0.6857	1.45836	0.0505	0.0023	0.171	0.0073	0.02462	0.00044	0.1509	159.5	6.3	156.8	2.7	187	86	156.8	2.7	1.69279
	201-SM482	201-SM482_9	201-SM482_9		204.6	0.68	1.47059	0.0488	0.0021	0.166	0.0068	0.02469	0.00043	0.23268	155.5	6.1	157.2	2.7	130	84	157.2	2.7	1.09325
	201-SM482	201-SM482_10	201-SM482_10		229.1	0.738	1.35501	0.0478	0.0023	0.166	0.0071	0.02488	0.00042	0.005386	155.6	6.2	158.4	2.6	110	89	158.4	2.6	1.79949
	201-SM482	201-SM482_11	201-SM482_11		658	0.5154	1.94024	0.0493	0.0013	0.1699	0.0044	0.02496	0.00035	0.079993	159.1	3.8	158.9	2.2	155	55	158.9	2.2	0.125707
	201-SM482	201-SM482_12	201-SM482_12		309.3	0.839	1.1919	0.0582	0.0023	0.2012	0.0073	0.02521	0.00041	0.053141	185.5	6.2	160.5	2.6	480	81	160.5	2.6	13.4771
	201-SM482	201-SM482_13	201-SM482_13		656	0.591	1.69205	0.0514	0.0014	0.1817	0.0054	0.02555	0.00036	0.26327	169.2	4.6	162.6	2.3	243	58	162.6	2.3	3.90071
	201-SM482	201-SM482_14	201-SM482_14		273	0.8028	1.24564	0.0524	0.0021	0.1792	0.0066	0.02503	0.00044	0.11105	166.8	5.7	159.4	2.7	265	78	159.4	2.7	4.43645
	201-SM482	201-SM482_16	201-SM482_16		504	0.661	1.51286	0.0492	0.0054	0.1706	0.02	0.02495	0.0004	0.1755	159.6	15	158.8	2.5	157	140	158.8	2.5	0.501253
	201-SM482	201-SM482_17	201-SM482_17		450.2	0.6586	1.51837	0.0493	0.0017	0.1751	0.0056	0.0258	0.00038	0.0081211	163.4	4.8	164.2	2.4	153	66	164.2	2.4	0.489596
	201-SM482	201-SM482_18	201-SM482_18		584	0.6681	1.49678	0.0487	0.0015	0.1685	0.005	0.02506	0.00035	0.096077	157.8	4.4	159.6	2.2	131	61	159.6	2.2	1.14068
	201-SM482	201-SM482_19	201-SM482_19		809	0.55	1.81818	0.0492	0.0012	0.1756	0.0047	0.02576	0.00041	0.34315	164	4	163.9	2.6	151	50	163.9	2.6	0.0609756
	201-SM482	201-SM482_20	201-SM482_20		283	0.763	1.31062	0.0529	0.0064	0.1859	0.027	0.02564	0.00052	0.044671	172.4	21	163.2	3.3	280	150	163.2	3.3	5.33643
	201-SM482	201-SM482_21	201-SM482_21		461	1.109	0.901713	0.0491	0.0016	0.1762	0.0053	0.02608	0.00039	0.021428	164.5	4.5	166	2.4	155	65	166	2.4	0.911854
	201-SM482	201-SM482_22	201-SM482_22		309	0.91	1.0989	0.0506	0.002	0.1848	0.007	0.02658	0.00046	0.1004	171.5	6	169.1	2.9	199	78	169.1	2.9	1.39942
	201-SM482	201-SM482_23	201-SM482_23		310	0.7622	1.31199	0.0501	0.002	0.1753	0.0069	0.02536	0.00045	0.087115	163.4	5.9	161.4	2.8	196	80	161.4	2.8	1.22399
	201-SM482	201-SM482_24	201-SM482_24		235.9	0.811	1.23305	0.0605	0.0025	0.2097	0.0087	0.02506	0.00043	0.12568	192.3	7.3	159.5	2.7	560	86	159.5	2.7	17.0567
	201-SM482	201-SM482_25	201-SM482_25		195	0.937	1.06724	0.0505	0.0023	0.1746	0.0076	0.02501	0.00047	0.001114	162.7	6.6	159.2	2.9	210	87	159.2	2.9	2.1512
	201-SM482	201-SM482_26	201-SM482_26		833	0.541	1.84843	0.0509	0.0013	0.1731	0.0044	0.02473	0.00034	0.17981	162.3	3.9	157.5	2.2	223	55	157.5	2.2	2.95749
	201-SM482	201-SM482_27	201-SM482_27		153.6	0.7721	1.29517	0.0518	0.0029	0.176	0.01	0.02495	0.00049	0.049126	163.6	8.6	158.9	3.1	250	110	158.9	3.1	2.87286
	201-SM482	201-SM482_28	201-SM482_28		239	1.105	0.904977	0.0529	0.0042	0.185	0.014	0.02553	0.00046	0.071513	171.2	12	162.5	2.9	280	120	162.5	2.9	5.08178
	201-SM482	201-SM482_29	201-SM482_29		920	0.5048	1.98098	0.0503	0.0012	0.1831	0.0042	0.02647	0.00035	0.10281	170.5	3.6	168.4	2.2	199	50	168.4	2.2	1.23167
	201-SM482	201-SM482_30	201-SM482_30		310	0.804	1.24378	0.0487	0.0018	0.167	0.0062	0.02503	0.00039	0.12178	157.3	5.5	159.3	2.5	151	72	159.3	2.5	1.27146
	201-SM482	201-SM482_31	201-SM482_31		281.1	0.7532	1.32767	0.0492	0.002	0.168	0.0067	0.02491	0.00042	0.17111	157.1	5.8	158.6	2.7	152	78	158.6	2.7	0.954806
	201-SM482	201-SM482_32	201-SM482_32		578	0.656	1.52439	0.0493	0.0015	0.1695	0.0052	0.02506	0.00035	0.12568	158.7	4.5	159.6	2.2	153	63	159.6	2.2	0.567108
	201-SM482	201-SM482_33	201-SM482_33		274.7	4	0.25	0.0575	0.0021	0.317	0.014	0.04023	0.0009	0.39966	278	10	254.3	5.6	470	75	254.3	5.6	8.52518
	201-SM482	201-SM482_34	201-SM482_34		249	4.3	0.232558	0.0621	0.0029	0.856	0.16	0.1002	0.0087	0.28463	626	54	615	48	652	74	615	48	1.75719
	201-SM482	201-SM482_35	201-SM482_35		553	0.6268	1.59541	0.0502	0.0015	0.1749	0.0051	0.02536	0.00038	0.13829	163.3	4.4	161.4	2.4	190	61	161.4	2.4	1.1635
	201-SM482	201-SM482_36	201-SM482_36		328.6	0.85	1.17647	0.0497	0.0018	0.1729	0.0059	0.02536	0.00039	0.12076	161.5	5.1	161.5	2.5	175	71	161.5	2.5	0
	201-SM482	201-SM482_37	201-SM482_37		174.4	0.978	1.02249	0.0564	0.0067	0.197	0.027	0.02541	0.00056	0.33764	182	20	161.7	3.5	410	150	161.7	3.5	11.1538
	201-SM482	201-SM482_38	201-SM482_38		312	0.777	1.287	0.0641	0.0033	0.227	0.01	0.02594	0.0005	0.009517	207	8.3	165.1	3.1	680	99	165.1	3.1	20.2415
	201-SM482	201-SM482_39	201-SM482_39		291.7	0.6657	1.50218	0.0519	0.0021	0.1766	0.0067	0.02496	0.00044	0.019875	164.6	5.8	158.9	2.8	253	80	158.9	2.8	3.46294
	201-SM482	201-SM482_40	201-SM482_40		381.6	0.745	1.34228	0.049	0.0017	0.1713	0.0058	0.02545	0.00038	0.10137	160.1	5	162	2.4	149	69	162	2.4	1.18676
	201-SM482	201-SM482_41	201-SM482_41		123	1.318	0.758725	0.051	0.0034	0.1427	0.009	0.02065	0.00051	0.034857	136.3	8.3	131.7	3.2	190	120	131.7	3.2	3.37491
	201-SM482	201-SM482_42	201-SM482_42		111.8	1.275	0.784314	0.0497	0.0036	0.139	0.0099	0.0209	0.00053	0.063246	130.7	8.7	133.3	3.3	120	130	133.3	3.3	1.98929
	201-SM482	201-SM482_43	201-SM482_43		182.3	1.086	0.92081	0.051	0.0023	0.1755	0.0079	0.02505	0.00046	0.21459	163.4	6.9	159.5	2.9	226	90	159.5	2.9	2.38678
	201-SM482	201-SM482_44	201-SM482_44		94.2	1.042	0.959693	0.0592	0.0046	0.205	0.015	0.02527	0.00055	0.12975	188	12	161.5	3.5	470	130	161.5	3.5	14.0957
	201-SM482	201-SM482_45	201-SM482_45		240	0.728	1.37363	0.0497	0.0025	0.1726	0.008	0.02548	0.00045	0.065053	160.8	6.9	162.2	2.8	163	94	162.2	2.8	0.870647
	201-SM482	201-SM482_46	201-SM482_46		627	0.659	1.51745	0.0492	0.0014	0.1724	0.0049	0.02545	0.00038	0.12262	161.2	4.3	162	2.4	166	61	162	2.4	0.496278
	201-SM482	201-SM482_47	201-SM482_47		567	0.4716	2.12044	0.052	0.0019	0.1857	0.0067	0.02595	0.00037	0.061871	172.6	5.6	165.2	2.3	280	69	165.2	2.3	4.28737
	201-SM482	201-SM482_48	201-SM482_48		253.9	0.687	1.4556	0.0498	0.0055	0.1754	0.023	0.02573	0.00055	0.11743	163.5	18	163.7	3.5	170	150	163.7	3.5	0.122324
	201-SM482	201-SM482_49	201-SM482_49		141.5	0.726	1.37741	0.0496	0.0032	0.142	0.0095	0.02111	0.00051	0.23234	135.1	8.3	134.7	3.3	160	110	134.7	3.3	0.296077
	201-SM482	201-SM482_50	201-SM482_50		251.4	0.793	1.26103	0.0527	0.0029	0.1752	0.011	0.02433	0.0005	0.099566	163.2	9.1	155	3.1	272	110	155	3.1	5.02451
